# Supplementary material for: Approach of Pregnant Women from Poland and the Ukraine to COVID-19 Vaccination—The Role of Medical Consultation
Source: MDPI journal article supplement (doi:10.3390/vaccines10020255), 2022-02-08
Supplement: s1 [file s1]

## Supplementary Materials

**Table S1.** General characteristics.

|                           | <b>Total<br/>N = 300</b> | <b>Poland<br/>N = 150</b> | <b>Ukraine<br/>N=150</b> | <b><i>P</i>-value</b> |
|---------------------------|--------------------------|---------------------------|--------------------------|-----------------------|
| Age, years                | 25.2 ± 4.3               | 25.5 ± 4.5                | 24.9 ± 4.1               | 0.16                  |
| Arterial hypertension     | 20 (6.7)                 | 10 (6.7)                  | 10 (6.7)                 | 1.0                   |
| Epilepsy                  | 9 (3)                    | 4 (2.7)                   | 5 (3.3)                  | 1.0                   |
| Diabetes mellitus         | 32 (10.7)                | 16 (10.7)                 | 16 (10.7)                | 1.0                   |
| Heart defect              | 8 (2.7)                  | 3 (2)                     | 5 (3.3)                  | 0.72                  |
| Bronchial asthma          | 14 (4.7)                 | 4 (2.7)                   | 10 (6.7)                 | 0.1                   |
| Pancreatitis              | 10 (3.3)                 | 6 (4)                     | 4 (2.7)                  | 0.52                  |
| Obesity                   | 31 (10.3)                | 11 (7.3)                  | 20 (13.3)                | 0.08                  |
| Psoriasis                 | 11 (3.7)                 | 11 (7.3)                  | 0 (0)                    | <0.001                |
| Migraine                  | 5 (1.7)                  | 2 (1.3)                   | 3 (2)                    | 1.0                   |
| Thrombophilia             | 10 (3.3)                 | 4 (2.7)                   | 6 (4)                    | 0.52                  |
| Celiac disease            | 8 (2.7)                  | 5 (3.3)                   | 3 (2)                    | 0.72                  |
| Sclerosis multiplex       | 9 (3)                    | 7 (4.7)                   | 2 (1.33)                 | 0.17                  |
| Allergy                   | 17 (5.7)                 | 3 (2)                     | 14 (9.3)                 | 0.006                 |
| Depression                | 9 (3)                    | 6 (4)                     | 3 (2)                    | 0.5                   |
| Bipolar affective disease | 5 (1.7)                  | 3 (2)                     | 1 (1.3)                  | 1.0                   |
| Melanoma                  | 2 (0.7)                  | 1 (0.7)                   | 1 (0.7)                  | 1.0                   |

|                                                               |          |       |          |      |
|---------------------------------------------------------------|----------|-------|----------|------|
| Cerebral tumour                                               | 1 (0.7)  | 0 (0) | 1 (0.7)  | 1.0  |
| Hypothyreosis                                                 | 22 (7.3) | 9 (6) | 13 (8.7) | 0.37 |
| Data are presented as mean $\pm$ SD and counts (percentages). |          |       |          |      |

**Table S2.** Socioeconomic indices.

|                          | Total<br>N = 300 | Poland<br>N = 150 | Ukraine<br>N=150 | P-value |
|--------------------------|------------------|-------------------|------------------|---------|
| Place of residence       |                  |                   |                  |         |
| Rural area               | 49 (16.3)        | 16 (10.7)         | 33 (22)          | 0.09    |
| City < 50,000 residents  | 78 (26)          | 33 (22)           | 45 (30)          |         |
| City < 250,000 residents | 137 (45.7)       | 93 (62)           | 44 (29.3)        |         |
| City ≥ 250,000 residents | 36 (12)          | 8 (5.3)           | 28 (18.7)        |         |
| Education                |                  |                   |                  |         |
| Primary                  | 37 (12.3)        | 14 (9.3)          | 23 (15.3)        | 0.03    |
| Vocational               | 53 (17.7)        | 23 (15.3)         | 30 (20)          |         |
| Secondary                | 108 (36)         | 56 (37.3)         | 52 (34.7)        |         |
| Higher                   | 102 (34)         | 57 (38)           | 45 (30)          |         |
| Prior births             | 180 (60)         | 89 (59.3)         | 91 (60.7)        | 0.57    |

|                                                                                                            |             |             |             |      |
|------------------------------------------------------------------------------------------------------------|-------------|-------------|-------------|------|
| Number of prior births                                                                                     | 1.14 ± 0.98 | 1.01 ± 0.93 | 1.28 ± 1.02 | 0.02 |
| Number of children                                                                                         | 1.09 ± 0.97 | 0.99 ± 0.9  | 1.2 ± 1.03  | 0.1  |
| Prior miscarriages                                                                                         | 0.74 ± 0.75 | 0.75 ± 0.77 | 0.73 ± 0.73 | 0.91 |
| Currently in relationship                                                                                  |             |             |             | 0.8  |
| Married                                                                                                    | 190 (63.3)  | 94 (62.7)   | 96 (64)     |      |
| Partnership                                                                                                | 94 (31.3)   | 49 (32.7)   | 45 (30)     |      |
| No relationship                                                                                            | 16 (5.3)    | 7 (4.7)     | 9 (6)       |      |
| Trimester of pregnancy:                                                                                    |             |             |             | 0.8  |
| first                                                                                                      | 46 (15.3)   | 23 (15.3)   | 23 (15.3)   |      |
| second                                                                                                     | 144 (48)    | 76 (50.7)   | 68 (45.3)   |      |
| third                                                                                                      | 110 (36.7)  | 51 (34)     | 59 (39.3)   |      |
| Chronic diseases                                                                                           | 140 (46.7)  | 70 (46.7)   | 70 (46.7)   | 1.0  |
| Medications                                                                                                | 137 (45.7)  | 72 (48)     | 65 (43.3)   | 0.41 |
| Allergies                                                                                                  | 97 (32.3)   | 46 (30.7)   | 51 (34)     | 0.07 |
| Has your doctor talked to you about the COVID-19 vaccination?                                              | 84 (28.1)   | 45 (30.2)   | 39 (26)     | 0.59 |
| Do you think that the course of COVID-19 disease in pregnancy, compared to non-pregnant women, is usually: |             |             |             | 0.32 |

|                                                                                                                                                                  |            |           |           |        |
|------------------------------------------------------------------------------------------------------------------------------------------------------------------|------------|-----------|-----------|--------|
| milder                                                                                                                                                           | 145 (48.6) | 69 (46.3) | 76 (51)   |        |
| comparable                                                                                                                                                       | 61 (20.5)  | 31 (20.8) | 30 (20.1) |        |
| more dangerous                                                                                                                                                   | 61 (20.5)  | 32 (21.5) | 29 (19.5) |        |
| much more dangerous                                                                                                                                              | 31 (10.4)  | 17 (11.4) | 14 (9.4)  |        |
| Do you think that immunity obtained by disease lasts longer than immunity acquired by vaccination?                                                               |            |           |           | <0.001 |
| definitely yes                                                                                                                                                   | 110 (36.7) | 49 (32.7) | 61 (40.7) |        |
| probably yes                                                                                                                                                     | 87 (29)    | 35 (23.3) | 52 (34.6) |        |
| probably not                                                                                                                                                     | 58 (19.3)  | 33 (22)   | 25 (16.7) |        |
| definitely not                                                                                                                                                   | 45 (15)    | 33 (23)   | 12 (8)    | <0.001 |
| What do you think is the effectiveness of COVID-19 vaccines in protecting against the disease (what percentage of people vaccinated will not contract COVID-19)? |            |           |           |        |
| About 20%                                                                                                                                                        | 77 (25.7)  | 21 (14)   | 56 (37.4) |        |
| About 40%                                                                                                                                                        | 94 (31.3)  | 50 (33.3) | 44 (29.3) |        |
| About 70%                                                                                                                                                        | 67 (22.3)  | 34 (22.7) | 33 (22.0) |        |
| Above 90%                                                                                                                                                        | 62 (20.7)  | 45 (30)   | 17 (11.3) |        |

|                                                                                                                      |            |           |           |        |
|----------------------------------------------------------------------------------------------------------------------|------------|-----------|-----------|--------|
| Do you think that vaccination against COVID-19 is safe in pregnancy?                                                 |            |           |           | <0.001 |
| Yes                                                                                                                  | 78 (26)    | 54 (36)   | 24 (16)   |        |
| No                                                                                                                   | 128 (42.7) | 55 (36.7) | 73 (48.7) |        |
| It depends on the trimester of pregnancy                                                                             | 47 (15.7)  | 27 (18)   | 20 (13.3) |        |
| I do not know                                                                                                        | 47 (15.7)  | 14 (9.3)  | 33 (22)   |        |
| Do you think the complications after receiving the COVID-19 vaccine are:                                             |            |           |           | <0.001 |
| very rare                                                                                                            | 27 (9)     | 18 (12)   | 9 (6)     |        |
| rare                                                                                                                 | 89 (29.7)  | 54 (36)   | 35 (23.3) |        |
| do not know                                                                                                          | 22 (7.3)   | 6 (4)     | 16 (10.7) |        |
| common                                                                                                               | 88 (29.3)  | 44 (29.3) | 44 (29.3) |        |
| very common                                                                                                          | 74 (24.7)  | 28 (18.7) | 46 (30.7) |        |
| Do you think that the complications of undergoing COVID-19 vaccine in pregnancy, compared to non-pregnant women are: |            |           |           | 0.02   |
| less dangerous                                                                                                       | 29 (9.7)   | 11 (7.3)  | 18 (12)   |        |
| equally dangerous                                                                                                    | 83 (27.7)  | 53 (35.4) | 30 (20)   |        |

|                                                                                         |            |           |            |       |
|-----------------------------------------------------------------------------------------|------------|-----------|------------|-------|
| more dangerous                                                                          | 151 (50.3) | 69 (46)   | 82 (54.7)  |       |
| do not know                                                                             | 37 (12.3)  | 17 (11.3) | 20 (13.3)  |       |
| Is the COVID-19 vaccine dangerous to the foetus ?                                       |            |           |            | 0.02  |
| ys                                                                                      | 164 (54.7) | 78 (52)   | 86 (57.3)  |       |
| no                                                                                      | 56 (18.7)  | 37 (24.7) | 19 (12.7)  |       |
| do not know                                                                             | 60 (20)    | 29 (19.3) | 29 (21.7)  |       |
| insufficient research on this topic                                                     | 20 (6.6)   | 6 (4)     | 14 (9.3)   |       |
| Have you been vaccinated against COVID-19?                                              |            |           |            | 0.002 |
| yes                                                                                     | 11 (3.7)   | 7 (4.7)   | 4 (2.7)    |       |
| yes, before pregnancy                                                                   | 16 (5.3)   | 14 (9.3)  | 2 (1.3)    |       |
| yes, during pregnancy                                                                   | 5 (1.7)    | 4 (2.7)   | 1 (0.7)    |       |
| first and second dose during pregnancy,                                                 | 6 (2)      | 4 (2.7)   | 2 (1.3)    |       |
| I postponed the first dose before pregnancy - full vaccination until later in pregnancy | 12 (4)     | 8 (5.3)   | 4 (2.7)    |       |
| I postponed the first dose during pregnancy - full vaccination after pregnancy          | 15 (5)     | 11 (7.3)  | 4 (2.7)    |       |
| no                                                                                      | 235 (78.3) | 102 (68)  | 133 (88.7) |       |

|                                                                                              |            |           |           |        |
|----------------------------------------------------------------------------------------------|------------|-----------|-----------|--------|
| In the previous question, the answer was 'no'. Reason for the negative approach:             |            |           |           |        |
| 1) Fear of post-vaccination complications/adverse reactions                                  | 173 (57.7) | 65 (43.3) | 108 (72)  | <0.001 |
| 2) Fear of damage to the foetus                                                              | 201 (67)   | 102 (68)  | 99 (66)   | 0.71   |
| 3) Fear of complications for pregnancy such as pre-term delivery                             | 103 (34.3) | 30 (20)   | 73 (48.7) | <0.001 |
| 4) I believe that vaccinations are ineffective                                               | 55 (18.3)  | 4 (2.7)   | 51 (34)   | <0.001 |
| 5) I believe that disease is better than vaccination and provides more long-lasting immunity | 17 (5.7)   | 2 (1.3)   | 15 (10)   | 0.001  |
| 6) I have not had such an opportunity yet due to limitations in the vaccination programme    | 12 (4)     | 2 (1.3)   | 10 (6.7)  | 0.02   |
| 7) Other reasons                                                                             | 3 (1)      | 1 (0.7)   | 2 (1.3)   | 1.0    |
| Are you concerned about the COVID-19 vaccination during pregnancy?                           |            |           |           | <0.001 |
| yes                                                                                          | 114 (38.3) | 41 (27.5) | 73 (49)   |        |
| probably yes                                                                                 | 103 (34.6) | 55 (36.9) | 48 (32.2) |        |
| probably no                                                                                  | 60 (20.1)  | 35 (23.5) | 25 (16.8) |        |

|                                                                                                                                         |            |           |            |        |
|-----------------------------------------------------------------------------------------------------------------------------------------|------------|-----------|------------|--------|
| definitely not                                                                                                                          | 21 (7)     | 18 (12.1) | 3 (2)      |        |
| Are you going to be vaccinated against COVID-19 when you are pregnant (if you have not yet been vaccinated)?                            |            |           |            | <0.001 |
| yes                                                                                                                                     | 37 (12.3)  | 27 (18)   | 10 (6.7)   |        |
| probably yes                                                                                                                            | 41 (13.7)  | 26 (17.3) | 15 (10)    |        |
| do not know                                                                                                                             | 45 (15)    | 25 (16.7) | 20 (13.3)  |        |
| no                                                                                                                                      | 140 (46.7) | 56 (37.3) | 84 (56)    |        |
| definitely not                                                                                                                          | 37 (12.3)  | 16 (10.7) | 21 (14)    |        |
| The question concerns women who answered 'no'/'rather not'/'definitely not' to the previous question. Reason for the negative approach: |            |           |            |        |
| 1) Fear of post-vaccination complications/adverse reactions                                                                             | 189 (63)   | 85 (56.7) | 104 (69.3) | 0.02   |
| 2) Fear of damage to the foetus                                                                                                         | 178 (59.3) | 78 (52)   | 100 (66.7) | 0.01   |
| 3) Fear of complications for pregnancy such as pre-term delivery                                                                        | 110 (36.7) | 41 (27.3) | 69 (46)    | <0.001 |
| 4) I believe that vaccinations are ineffective                                                                                          | 46 (15.3)  | 8 (5.3)   | 38 (25.3)  | <0.001 |



|                                                                                                           |            |           |           |        |
|-----------------------------------------------------------------------------------------------------------|------------|-----------|-----------|--------|
| 5) I believe that disease is better than vaccination and provides more long-lasting immunity              | 9 (3)      | 2 (1.3)   | 7 (4.7)   | 0.17   |
| 6) Other reasons                                                                                          | 1 (0.3)    | 0 (0)     | 1 (0.7)   | 1.0    |
| Have you vaccinated your children against COVID-19?                                                       |            |           |           | 0.002  |
| yes                                                                                                       | 33 (11)    | 23 (15.3) | 10 (6.6)  |        |
| no                                                                                                        | 122 (40.7) | 47 (31.3) | 74 (50)   |        |
| I have not had such an opportunity yet due to the age restrictions in the vaccination programme           | 114 (38)   | 68 (45.4) | 46 (30.7) |        |
| I do not have children yet                                                                                | 29 (10.3)  | 11 (8)    | 18 (12.7) |        |
| The question concerns women who answered 'no' in the previous question. Reason for the negative approach: |            |           |           |        |
| 1) Risk of post-vaccination complications/undesirable effects                                             | 187 (62.3) | 93 (62)   | 94 (62.7) | 0.9    |
| 2) I believe that vaccinations are ineffective                                                            | 87 (29)    | 27 (18)   | 60 (40)   | <0.001 |
| 3) I believe that disease is better than vaccination and provides more long-lasting immunity              | 65 (21.7)  | 22 (14.7) | 43 (28.7) | 0.003  |
| 4) Other reasons                                                                                          | 23 (7.7)   | 6 (4)     | 17 (11.3) | 0.02   |

|                                                                                                                                         |            |           |           |        |
|-----------------------------------------------------------------------------------------------------------------------------------------|------------|-----------|-----------|--------|
| Are you planning to vaccinate your children against COVID-19?                                                                           |            |           |           | <0.001 |
| yes                                                                                                                                     | 46 (15.4)  | 31 (20.7) | 15 (10.1) |        |
| probably yes                                                                                                                            | 49 (16.4)  | 28 (18.7) | 21 (14.1) |        |
| do not know                                                                                                                             | 82 (27.4)  | 40 (26.7) | 42 (28.2) |        |
| no                                                                                                                                      | 106 (35.4) | 47 (31.3) | 59 (39.6) |        |
| definitely not                                                                                                                          | 16 (5.3)   | 4 (2.7)   | 12 (8)    |        |
| The question concerns women who answered 'no'/'rather not'/'definitely not' to the previous question. Reason for the negative approach: |            |           |           |        |
| 1) Risk of post-vaccination complications/undesirable effects                                                                           | 184 (61.3) | 88 (58.7) | 96 (64)   | 0.34   |
| 2) I believe that vaccinations are ineffective                                                                                          | 94 (31.3)  | 35 (23.3) | 59 (39.3) | 0.003  |
| 3) I believe that disease is better than vaccination and provides more long-lasting immunity                                            | 73 (24.3)  | 26 (17.3) | 47 (31.3) | 0.005  |
| 4) Other reasons:                                                                                                                       | 28 (9.3)   | 8 (5.33)  | 20 (13.3) | 0.02   |
| Would you like your relatives to get vaccinated against COVID-19?                                                                       |            |           |           | 0.04   |

|                                                                                                                                         |            |           |           |        |
|-----------------------------------------------------------------------------------------------------------------------------------------|------------|-----------|-----------|--------|
| yes                                                                                                                                     | 64 (21.3)  | 39 (26)   | 25 (16.7) |        |
| yes, but only relatives at risk of severe disease                                                                                       | 66 (22)    | 33 (22)   | 33 (22)   |        |
| do not know                                                                                                                             | 68 (22.7)  | 33 (22)   | 35 (23.3) |        |
| no                                                                                                                                      | 93 (31)    | 42 (28)   | 51 (34)   |        |
| definitely not                                                                                                                          | 9 (3)      | 3 (2)     | 6 (4)     |        |
| The question concerns women who answered 'no'/'rather not'/'definitely not' to the previous question. Reason for the negative approach: |            |           |           |        |
| 1) Risk of post-vaccination complications/undesirable effects                                                                           | 187 (62.3) | 88 (58.7) | 99 (66)   | 0.19   |
| 2) I believe that vaccinations are ineffective                                                                                          | 95 (31.7)  | 34 (22.7) | 61 (40.7) | <0.001 |
| 3) I believe that disease is better than vaccination and provides more long-lasting immunity                                            | 56 (18.7)  | 17 (11.3) | 39 (26)   | 0.001  |
| 4) Other reasons                                                                                                                        | 17 (5.7)   | 4 (2.7)   | 13 (8.7)  | 0.02   |

**Table S3.** Other questions.

| Has your doctor talked to you about the COVID-19 vaccination?                                                                                                    | <b>Total</b><br>N = 300 | <b>Poland</b><br>N = 150 | <b>Ukraine</b><br>N=150 | <b>P-value</b> |
|------------------------------------------------------------------------------------------------------------------------------------------------------------------|-------------------------|--------------------------|-------------------------|----------------|
| Do you think that the course of COVID-19 disease in pregnancy, compared to non-pregnant women, is usually:                                                       |                         |                          |                         |                |
| milder                                                                                                                                                           | 13 (4.3)                | 5 (3.3)                  | 8 (5.4)                 |                |
| comparable                                                                                                                                                       | 62 (20.7)               | 38 (25.3)                | 24 (16.1)               |                |
| more dangerous                                                                                                                                                   | 103 (34.4)              | 31 (20.7)                | 72 (48.3)               |                |
| much more dangerous                                                                                                                                              | 121 (40.5)              | 76 (50.7)                | 45 (30.2)               |                |
| Do you think that immunity obtained by disease lasts longer than immunity acquired by vaccination?                                                               |                         |                          |                         | <0.001         |
| definitely yes                                                                                                                                                   | 25 (8.4)                | 7 (4.7)                  | 18 (12.1)               |                |
| probably yes                                                                                                                                                     | 50 (16.8)               | 14 (9.5)                 | 36 (24.2)               |                |
| probably not                                                                                                                                                     | 83 (27.9)               | 30 (20.3)                | 53 (35.6)               |                |
| definitely not                                                                                                                                                   | 139 (46.8)              | 97 (65.5)                | 42 (28.2)               |                |
| What do you think is the effectiveness of COVID-19 vaccines in protecting against the disease (what percentage of people vaccinated will not contract COVID 19)? |                         |                          |                         | <0.001         |

|                                                                          |            |            |           |        |
|--------------------------------------------------------------------------|------------|------------|-----------|--------|
| about 20%                                                                | 17 (5.7)   | 3 (2)      | 14 (9.5)  |        |
| about 40%                                                                | 35 (11.8)  | 10 (6.7)   | 25 (16.9) |        |
| about 70%                                                                | 41 (13.8)  | 14 (9.4)   | 27 (18.2) |        |
| above 90%                                                                | 204 (68.7) | 121 (81.9) | 82 (55.4) |        |
| Do you think that vaccination against COVID-19 is safe in pregnancy?     |            |            |           |        |
| yes                                                                      | 172 (57.5) | 101 (67.3) | 71 (47.6) | 0.002  |
| no                                                                       | 53 (17.7)  | 22 (14.7)  | 31 (20.8) |        |
| depends on the trimester of pregnancy                                    | 43 (14.4)  | 12 (8)     | 31 (20.8) |        |
| I do not know                                                            | 31 (10.4)  | 15 (10)    | 16 (10.7) |        |
| Do you think the complications after receiving the COVID-19 vaccine are: |            |            |           | <0.001 |
| very rare                                                                | 127 (42.5) | 85 (56.7)  | 42 (28.2) |        |
| rare                                                                     | 105 (35.1) | 47 (31.3)  | 58 (38.9) |        |
| do not know                                                              | 13 (4.3)   | 3 (2)      | 10 (6.7)  |        |
| common                                                                   | 24 (8.03%) | 6 (4)      | 18 (12.1) |        |
| very common                                                              | 30 (10)    | 9 (6)      | 21 (14.1) |        |

|                                                                                                                       |            |            |           |        |
|-----------------------------------------------------------------------------------------------------------------------|------------|------------|-----------|--------|
| Do you think that the complications of having the COVID-19 vaccine in pregnancy, compared to non-pregnant women, are: |            |            |           | 0.001  |
| less dangerous                                                                                                        | 19 (6.3)   | 10 (6.7)   | 9 (6)     |        |
| equally dangerous                                                                                                     | 207 (69.2) | 118 (78.7) | 89 (59.7) |        |
| more dangerous                                                                                                        | 52 (17.4)  | 13 (8.7)   | 39 (26.2) |        |
| do not know                                                                                                           | 19 (7)     | 7 (2)      | 12 (8)    |        |
| Is the COVID-19 vaccine dangerous to the foetus?                                                                      |            |            |           | 0.002  |
| yes                                                                                                                   | 52 (17.4)  | 19 (12.7)  | 33 (22.1) |        |
| no                                                                                                                    | 169 (56.5) | 102 (68)   | 67 (45)   |        |
| do not know                                                                                                           | 53 (17.7)  | 21 (14)    | 31 (21.5) |        |
| insufficient research on this topic                                                                                   | 25 (8.4)   | 8 (5.3)    | 17 (11.4) |        |
| Have you been vaccinated against COVID-19?                                                                            |            |            |           | <0.001 |
| yes                                                                                                                   | 16 (5.3)   | 11 (7.3)   | 5 (3.4)   |        |
| yes, before pregnancy                                                                                                 | 19 (6.3)   | 13 (8.7)   | 6 (4)     |        |
| yes, during pregnancy                                                                                                 | 10 (3.3)   | 6 (4)      | 4 (2.7)   |        |
| the first and second dose during pregnancy                                                                            | 9 (3)      | 6 (4)      | 3 (2)     |        |
| I postponed the first dose before pregnancy - full vaccination until later in pregnancy                               | 23 (7.7)   | 16 (10.7)  | 7 (4.7)   |        |

|                                                                                              |            |           |            |        |
|----------------------------------------------------------------------------------------------|------------|-----------|------------|--------|
| I postponed the first dose during pregnancy - full vaccination after pregnancy               | 33 (11)    | 28 (18.7) | 5 (3.4)    |        |
| no                                                                                           | 189 (63.2) | 70 (46.7) | 119 (79.9) |        |
| In the previous question, the answer was 'no'. Reason for the negative approach:             |            |           |            |        |
| 1) Fear of post-vaccination complications/adverse reactions                                  | 120 (40)   | 28 (18.7) | 92 (61.3)  | <0.001 |
| 2) Fear of damage to the foetus                                                              | 160 (53.3) | 73 (48.7) | 87 (58)    | 0.1    |
| 3) Fear of complications for pregnancy such as pre-term delivery                             | 74 (24.7)  | 18 (12)   | 56 (37.3)  | <0.001 |
| 4) I believe that vaccinations are ineffective                                               | 23 (7.7)   | 4 (2.7)   | 19 (12.7)  | 0.001  |
| 5) I believe that disease is better than vaccination and provides more long-lasting immunity | 4 (1.3)    | 1 (0.7)   | 3 (2)      | 0.62   |
| 6) I have not had such an opportunity yet due to limitations in the vaccination programme    | 8 (2.7)    | 1 (0.7)   | 7 (4.7)    | 0.07   |
| 7) Other reasons                                                                             | 1 (0.3)    | 0 (0)     | 1 (0.7)    | 1.0    |
| Are you concerned about the COVID-19 vaccination in pregnancy?                               |            |           |            | <0.001 |
| yes                                                                                          | 49 (16.6)  | 19 (12.8) | 30 (20.4)  |        |
| probably yes                                                                                 | 54 (18.3)  | 19 (12.8) | 35 (23.8)  |        |
| probably no                                                                                  | 102 (34.6) | 46 (31.1) | 56 (38.1)  |        |

|                                                                                                                                         |            |           |           |        |
|-----------------------------------------------------------------------------------------------------------------------------------------|------------|-----------|-----------|--------|
| definitely not                                                                                                                          | 90 (30.5)  | 64 (43.2) | 26 (17.7) |        |
| Are you going to get vaccinated against COVID-19 when you are pregnant (if you have not yet been vaccinated)?                           |            |           |           | <0.001 |
| yes                                                                                                                                     | 106 (35.4) | 75 (50)   | 31 (20.8) |        |
| probably yes                                                                                                                            | 72 (24.1)  | 34 (22.7) | 38 (25.5) |        |
| do not know                                                                                                                             | 43 (14.4)  | 14 (9.3)  | 29 (19.5) |        |
| no                                                                                                                                      | 59 (19.7)  | 23 (15.3) | 36 (24.2) |        |
| definitely not                                                                                                                          | 19 (6.3)   | 4 (2.7)   | 15 (10.1) |        |
| The question concerns women who answered 'no'/'rather not'/'definitely not' to the previous question. Reason for the negative approach: |            |           |           |        |
| 1) Fear of post-vaccination complications/adverse reactions                                                                             | 101 (33.7) | 37 (24.7) | 64 (42.7) | 0.001  |
| 2) Fear of damage to the foetus                                                                                                         | 78 (26)    | 22 (14.7) | 56 (37.3) | <0.001 |
| 3) Fear of complications for pregnancy such as pre-term delivery                                                                        | 37 (12.3)  | 4 (2.7)   | 33 (22)   | <0.001 |
| 4) I believe that vaccinations are ineffective                                                                                          | 17 (5.7)   | 4 (2.7)   | 13 (8.7)  | 0.02   |
| 5) I believe that disease is better than vaccination and provides more long-lasting immunity                                            | 5 (1.7)    | 1 (0.7)   | 4 (2.7)   | 0.37   |
| 6) Other reasons                                                                                                                        | 2 (0.7)    | 1 (0.7)   | 1 (0.7)   | 1.0    |



|                                                                                                           |            |           |           |        |
|-----------------------------------------------------------------------------------------------------------|------------|-----------|-----------|--------|
| Have you vaccinated your children against COVID-19?                                                       |            |           |           | <0.001 |
| yes                                                                                                       | 81 (27.3)  | 59 (39.3) | 22 (15)   |        |
| no                                                                                                        | 76 (25.6)  | 27 (18)   | 49 (33.3) |        |
| I have not had such an opportunity yet due to the age restrictions in the vaccination programme           | 108 (36.4) | 53 (35.3) | 55 (37.4) |        |
| I don't have children yet                                                                                 | 32 (10.8)  | 11 (7.3)  | 21 (14.3) |        |
| The question concerns women who answered 'no' to the previous question. Reason for the negative approach: |            |           |           |        |
| 1) Risk of post-vaccination complications/undesirable effects                                             | 134 (44.7) | 57 (38)   | 77 (51.3) | 0.02   |
| 2) I believe that vaccinations are ineffective                                                            | 50 (16.7)  | 10 (6.7)  | 40 (26.7) | <0.001 |
| 3) I believe that disease is better than vaccination and provides more long-lasting immunity              | 31 (10.3)  | 3 (2)     | 28 (18.7) | <0.001 |
| 4) Other reasons                                                                                          | 15 (5)     | 4 (2.7)   | 11 (7.3)  | 0.06   |
| Are you planning to vaccinate your children against COVID-19?                                             |            |           |           | <0.001 |
| yes                                                                                                       | 135 (45.9) | 88 (59.1) | 47 (32.4) |        |
| probably yes                                                                                              | 84 (28.6)  | 40 (26.8) | 44 (30.3) |        |
| do not know                                                                                               | 46 (15.6)  | 15 (10.1) | 31 (21.4) |        |
| no                                                                                                        | 22 (7.5)   | 4 (2.7)   | 18 (12.4) |        |

|                                                                                                                                         |            |           |           |        |
|-----------------------------------------------------------------------------------------------------------------------------------------|------------|-----------|-----------|--------|
| definitely not                                                                                                                          | 7 (2.4)    | 2 (1.3)   | 5 (3.4)   |        |
| The question concerns women who answered 'no'/'rather not'/'definitely not' to the previous question. Reason for the negative approach: |            |           |           |        |
| 1) Risk of post-vaccination complications/undesirable effects                                                                           | 73 (24.3)  | 26 (17.3) | 47 (31.3) | 0.004  |
| 2) I believe that vaccinations are ineffective                                                                                          | 36 (12)    | 8 (5.33)  | 28 (18.7) | <0.001 |
| 3) I believe that disease is better than vaccination and provides more long-lasting immunity                                            | 17 (5.67)  | 2 (1.33)  | 15 (10)   | 0.001  |
| 4) Other reasons                                                                                                                        | 11 (3.7)   | 2 (1.33)  | 9 (6)     | 0.03   |
| Would you like your relatives to get vaccinated against COVID-19?                                                                       |            |           |           | <0.001 |
| yes                                                                                                                                     | 167 (56.6) | 95 (63.3) | 72 (49.7) |        |
| yes, but only relatives at risk of severe disease                                                                                       | 64 (21.7)  | 35 (23.3) | 29 (20)   |        |
| do not know                                                                                                                             | 43 (14.6)  | 14 (9.3)  | 29 (20)   |        |
| no                                                                                                                                      | 21 (7.1)   | 6 (4)     | 15 (10.3) |        |
| Definitely not                                                                                                                          |            |           |           |        |

|                                                                                                                                         |          |           |           |      |
|-----------------------------------------------------------------------------------------------------------------------------------------|----------|-----------|-----------|------|
| The question concerns women who answered 'no'/'rather not'/'definitely not' to the previous question. Reason for the negative approach: | 57 (19)  | 29 (19.3) | 28 (18.7) | 0.88 |
| 1) Risk of post-vaccination complications/undesirable effects                                                                           | 17 (5.7) | 5 (3.3)   | 12 (8)    | 0.08 |
| 2) I believe that vaccinations are ineffective                                                                                          | 0 (0)    | 0 (0)     | 0 (0)     | -    |
| 3) I believe that disease is better than vaccination and provides more long-lasting immunity                                            | 0 (0)    | 0 (0)     | 0 (0)     | -    |
| 4) Other reasons                                                                                                                        | 0 (0)    | 0 (0)     | 0 (0)     | -    |

**Table S4.** Socioeconomic indices- acceptance before and after medical consultation.

|                         | Before physician consultation |            |           |         | After physician consultation |             |         |
|-------------------------|-------------------------------|------------|-----------|---------|------------------------------|-------------|---------|
|                         | Total                         | Disagree   | Agree     | P value | Disagree                     | Agree       | P-value |
| Place of residence:     |                               |            |           |         |                              |             |         |
| Rural are               | 49 (16.3)                     | 45 (19.1)  | 4 (6.1)   | 0.001   | 34 (17.9)                    | 14 (12.7)   | 0.05    |
| City < 50000 residents  | 78 (26)                       | 68 (28.9)  | 10 (15.4) |         | 60 (31.7)                    | 18 (16.3)   |         |
| City < 250000 residents | 137 (45.7)                    | 95 (40.4)  | 42 (64.6) |         | 69 (36.5)                    | 68 (61.8)   |         |
| City ≥ 250000 residents | 36 (12)                       | 27 (11.5)  | 9 (13.8)  |         | 26 (13.7)                    | 10 (9.1)    |         |
| Education               |                               |            |           |         |                              |             |         |
| Primary                 | 37 (12.3%)                    | 30 (12.7%) | 7 (10.7%) | 0.006   | 21 (11.1%)                   | 16 (14.55%) | 0.009   |

|                        |                 |                 |                    |      |                    |                    |       |
|------------------------|-----------------|-----------------|--------------------|------|--------------------|--------------------|-------|
| Vocational             | 53 (17.6%)      | 48 (20.4%)      | 5 (7.7%)           |      | 44 (23.2%)         | 9 (8.1%)           |       |
| Secondary              | 108 (36.0%)     | 88 (37.4%)      | 20 (30.7%)         |      | 76 (40.2%)         | 32 (29.1%)         |       |
| Higher                 | 102 (34.0%)     | 69 (29.4%)      | 33 (50.7%)         |      | 48 (25.4%)         | 53 (48.1%)         |       |
| Prior births           | 178 (59.3%)     | 144 (61.2%)     | 34 (52.3%)         | 0.19 | 122 (64.5%)        | 56 (50.9%)         | 0.02  |
| Number of prior births |                 |                 |                    | 0.06 |                    |                    | 0.001 |
| n                      | 300             | 235             | 65                 |      | 189                | 110                |       |
| Mean ( $\pm$ SD)       | 0.95 $\pm$ 0.96 | 1.00 $\pm$ 0.97 | 0.75 ( $\pm$ 0.90) |      | 1.08 ( $\pm$ 0.99) | 0.72 ( $\pm$ 0.88) |       |
| Median (Q1;Q3)         | 1.00            | 1.00            | 0.00               |      | 1.00               | 0.00               |       |
|                        | (0.00;2.00)     | (0.00;2.00)     | (0.00;1.50)        |      | (0.00;2.00)        | (0.00;1.00)        |       |

|                             |                      |                     |                     |      |                     |                     |       |
|-----------------------------|----------------------|---------------------|---------------------|------|---------------------|---------------------|-------|
| Number of children          |                      |                     |                     | 0.05 |                     |                     | 0.003 |
| n                           | 300                  | 235                 | 65                  |      | 189                 | 110                 |       |
| Mean( $\pm$ SD)             | 0.93 ( $\pm$ 0.96)   | 0.99 ( $\pm$ 0.98)  | 0.72 ( $\pm$ 0.86)  |      | 1.07 ( $\pm$ 1.01)  | 0.71 ( $\pm$ 0.82)  |       |
| Median (Q1;Q3)              | 1.00<br>(0.00; 2.00) | 1.00<br>(0.00;2.00) | 0.00<br>(0.00;1.00) |      | 1.00<br>(0.00;2.00) | 0.00<br>(0.00;1.00) |       |
| Prior miscarriages          |                      |                     |                     | 0.39 |                     |                     | 0.24  |
| n                           | 300                  | 235                 | 65                  |      | 189                 | 110                 |       |
| Mean ( $\pm$ SD)            | 0.74 $\pm$ 0.75      | 0.76 $\pm$ 0.75     | 0.68 $\pm$ 0.75     |      | 0.78 $\pm$ 0.75     | 0.68 $\pm$ 0.75     |       |
| Median (Q1;Q3)              | 1.00<br>(0.00;1.00)  | 1.00<br>(0.00;1.00) | 1.00<br>(0.00;1.00) |      | 1.00<br>(0.00;1.00) | 1.00<br>(0.00;1.00) |       |
| Currently in a relationship |                      |                     |                     |      |                     |                     | 0.093 |

|                                                               |             |             |            |        |             |            |       |
|---------------------------------------------------------------|-------------|-------------|------------|--------|-------------|------------|-------|
| Married                                                       | 190 (63.3%) | 156 (66.3%) | 34 (52.3%) |        | 128 (67.7%) | 61 (55.4%) |       |
| Partnership                                                   | 94 (31.3%)  | 68 (28.9%)  | 26 (40.0%) |        | 53 (28.0%)  | 41 (37.2%) |       |
| No relationship                                               | 16 (5.3%)   | 11 (4.6%)   | 5 (7.6%)   |        | 8 (4.2%)    | 8 (7.2%)   |       |
| Trimester of pregnancy                                        |             |             |            | 0.818  |             |            | 0.367 |
| First                                                         | 46 (15.3)   | 37 (15.7)   | 9 (13.8%)  |        | 27 (14.3%)  | 19 (17.2%) |       |
| Second                                                        | 144 (48)    | 112 (47.6)  | 32 (49.2%) |        | 90 (47.6%)  | 54 (49.1%) |       |
| Third                                                         | 110 (36.6)  | 86 (36.60)  | 24 (36.9)  |        | 72 (38.1%)  | 37 (33.6%) |       |
| Chronic diseases                                              | 140 (46.6)  | 104 (44.2)  | 36 (55.3)  | 0.11   | 85 (44.9%)  | 55 (50.0%) | 0.40  |
| Medications                                                   | 137 (45.6)  | 101 (42.9)  | 36 (55.3)  | 0.07   | 81 (42.8%)  | 56 (50.9%) | 0.18  |
| Allergies                                                     | 102 (34)    | 70 (29.7)   | 32 (49.2)  | 0.003  | 64 (33.8%)  | 38 (34.5%) | 0.90  |
| Has your doctor talked to you about the COVID-19 vaccination? | 84 (28.1)   | 48 (20.5)   | 36 (55.4)  | <0.001 | 39 (20.7%)  | 45 (40.9%) | 0.001 |

|                                                                                                           |             |             |            |        |             |            |        |
|-----------------------------------------------------------------------------------------------------------|-------------|-------------|------------|--------|-------------|------------|--------|
| Do you think that the course of COVID-19 disease in pregnancy, compared to non-pregnant women, is usually |             |             |            | <0.001 |             |            | 0.02   |
| Milder                                                                                                    | 145 (48.6%) | 134 (57.5%) | 11 (16.9%) |        | 102 (54.5%) | 43 (39.1%) |        |
| Comparable                                                                                                | 61 (20.4%)  | 45 (19.3%)  | 16 (24.6%) |        | 37 (19.8%)  | 23 (20.9%) |        |
| More dangerous                                                                                            | 61 (20.4%)  | 35 (15.0%)  | 26 (40.0%) |        | 29 (15.5%)  | 32 (29.1%) |        |
| Much more dangerous                                                                                       | 31 (10.4%)  | 19 (8.1%)   | 12 (18.4%) |        | 19 (10.1%)  | 12 (10.9%) |        |
| Do you think that immunity obtained by disease lasts longer than immunity acquired by vaccination?        |             |             |            | <0.001 |             |            | <0.001 |
| Definitely yes                                                                                            | 110 (36.6%) | 106 (45.1%) | 4 (6.1%)   |        | 85 (44.9%)  | 25 (22.7%) |        |
| Probably yes                                                                                              | 87 (29.0%)  | 79 (33.6%)  | 8 (12.3%)  |        | 61 (32.2%)  | 25 (22.7%) |        |
| Probably not                                                                                              | 58 (19.3%)  | 32 (13.6%)  | 26 (40.0%) |        | 28 (14.8%)  | 30 (27.2%) |        |



|                                                                                                                                                                  |             |             |            |        |            |            |        |
|------------------------------------------------------------------------------------------------------------------------------------------------------------------|-------------|-------------|------------|--------|------------|------------|--------|
| Definitely not                                                                                                                                                   | 45 (15.0%)  | 18 (7.6%)   | 27 (41.5%) |        | 15 (7.9%)  | 30 (27.2%) |        |
| What do you think is the effectiveness of COVID-19 vaccines in protecting against the disease (what percentage of people vaccinated will not contract COVID-19)? |             |             |            | <0.001 |            |            | <0.001 |
| About 20%                                                                                                                                                        | 77 (25.6%)  | 70 (29.7%)  | 7 (10.7%)  |        | 26 (13.7%) | 52 (47.2%) |        |
| About 40%                                                                                                                                                        | 94 (31.3%)  | 91 (38.7%)  | 3 (4.6%)   |        | 99 (52.3%) | 29 (26.3%) |        |
| About 70%                                                                                                                                                        | 67 (22.3%)  | 48 (20.4%)  | 19 (29.2%) |        | 29 (15.3%) | 18 (16.3%) |        |
| Above 90%                                                                                                                                                        | 62 (20.6%)  | 26 (11.0%)  | 36 (55.3%) |        | 35 (18.5%) | 11 (10.0%) |        |
| Do you think that vaccination against COVID-19 is safe in pregnancy?                                                                                             |             |             |            | <0.001 |            |            | <0.001 |
| Yes                                                                                                                                                              | 78 (26.0%)  | 33 (14.0%)  | 45 (69.2%) |        | 26 (13.7%) | 52 (47.2%) |        |
| No                                                                                                                                                               | 128 (42.6%) | 120 (51.0%) | 8 (12.3%)  |        | 99 (52.3%) | 29 (26.3%) |        |

|                                                                                                                      |             |            |            |        |            |            |        |
|----------------------------------------------------------------------------------------------------------------------|-------------|------------|------------|--------|------------|------------|--------|
| It depends on the trimester of pregnancy                                                                             | 47 (15.6%)  | 38 (16.1%) | 9 (13.8%)  |        | 29 (15.3%) | 18 (16.3%) |        |
| I do not know                                                                                                        | 47 (15.67%) | 44 (18.7%) | 3 (4.6%)   |        | 35 (18.5%) | 11 (10.0%) |        |
| Do you think the complications after receiving the COVID-19 vaccine are:                                             |             |            |            | <0.001 |            |            | <0.001 |
| Very rare                                                                                                            | 27 (9.00%)  | 11 (4.6%)  | 16 (24.6%) |        | 11 (5.8%)  | 16 (14.5%) |        |
| Rare                                                                                                                 | 89 (29.6%)  | 48 (20.4%) | 41 (63.0%) |        | 37 (19.5%) | 51 (46.3%) |        |
| I do not know                                                                                                        | 22 (7.3%)   | 20 (8.5%)  | 2 (3.0%)   |        | 20 (10.5%) | 2 (1.8%)   |        |
| Common                                                                                                               | 88 (29.3%)  | 86 (3.%)   | 2 (3.0%)   |        | 67 (35.4%) | 21 (19.0%) |        |
| Very common                                                                                                          | 74 (24.6%)  | 70 (29.7%) | 4 (6.1%)   |        | 54 (28.5%) | 20 (18.1%) |        |
| Do you think that the complications of getting the COVID-19 vaccine in pregnancy compared to non-pregnant women are: |             |            |            | <0.001 |            |            | <0.001 |

|                                                  |             |             |            |        |             |            |        |
|--------------------------------------------------|-------------|-------------|------------|--------|-------------|------------|--------|
| Less dangerous                                   | 29 (9.6%)   | 24 (10.2%)  | 5 (7.6%)   |        | 19 (10.0%)  | 10 (9.0%)  |        |
| Equally dangerous                                | 83 (27.6%)  | 33 (14.0%)  | 50 (76.9%) |        | 26 (13.7%)  | 57 (51.8%) |        |
| More dangerous                                   | 151 (50.3%) | 144 (61.2%) | 7 (10.7%)  |        | 115 (60.8%) | 36 (32.7%) |        |
| I do not know                                    | 37 (12.3%)  | 34 (14.4%)  | 3 (4.6%)   |        | 29 (15.3%)  | 7 (6.3%)   |        |
| Is the COVID-19 vaccine dangerous to the foetus? |             |             |            | <0.001 |             |            | <0.001 |
| Yes                                              | 164 (54.6%) | 142 (60.4%) | 22 (33.8%) |        | 108 (57.1%) | 56 (50.9%) |        |
| No                                               | 56 (18.6%)  | 30 (12.7%)  | 26 (40.0%) |        | 24 (12.70%) | 32 (29.0%) |        |
| I do not know                                    | 60 (20.0%)  | 49 (20.8%)  | 11 (16.9%) |        | 43 (22.75%) | 17 (15.4%) |        |
| Insufficient research on this topic              | 20 (6.6%)   | 14 (5.9%)   | 6 (9.2%)   |        | 14 (7.41%)  | 5 (4.5%)   |        |
| Have you been vaccinated against COVID-19?       |             |             |            | <0.001 |             |            | <0.001 |
| Yes                                              | 11 (3.6%)   | 0 (0.0%)    | 11 (16.9%) |        | 2 (1.0%)    | 9 (8.18%)  |        |

|                                                                                         |             |              |             |        |             |            |        |
|-----------------------------------------------------------------------------------------|-------------|--------------|-------------|--------|-------------|------------|--------|
| Yes, before pregnancy                                                                   | 16 (5.3%)   | 0 (0.0%)     | 16 (24.6%)  |        | 2 (1.0%)    | 14 (12.7%) |        |
| Yes, during pregnancy                                                                   | 5 (1.6%)    | 0 (0.0%)     | 5 (7.6%)    |        | 0 (0.0%)    | 5 (4.5%)   |        |
| The first and second dose during pregnancy                                              | 6 (2.0%)    | 0 (0.0%)     | 6 (9.2%)    |        | 0 (0.0%)    | 6 (5.4%)   |        |
| I postponed the first dose before pregnancy - full vaccination until later in pregnancy | 12 (4.0%)   | 0 (0.0%)     | 12 (18.4%)  |        | 1 (0.5%)    | 11 (10.0%) |        |
| I postponed the first dose during pregnancy - full vaccination after pregnancy          | 15 (5.0%)   | 0 (0.0%)     | 15 (23.0%)  |        | 2 (1.0%)    | 13 (11.8%) |        |
| No                                                                                      | 235 (78.3%) | 235 (100.0%) | 0 (0.0%)    |        | 182 (96.3%) | 52 (47.2%) |        |
| In the previous question, the answer was 'no'. Reason for the negative approach:        |             |              |             |        |             |            |        |
| 1) Fear of post-vaccination complications/adverse reactions                             | 164 (69.7%) | 9 (13.8%)    | 173 (57.6%) | <0.001 | 133 (70.3%) | 40 (36.3%) | <0.001 |
| 2) Fear of damage to the foetus                                                         | 201 (67.0%) | 189 (80.4%)  | 12 (18.4%)  | <0.001 | 144 (76.1%) | 56 (50.9%) | <0.001 |
| 3) Fear of complications for pregnancy such as pre-term delivery                        | 103 (34.3%) | 98 (41.7%)   | 5 (7.6%)    | <0.001 | 83 (43.9%)  | 20 (18.1%) | <0.001 |

|                                                                                              |             |             |            |        |             |            |        |
|----------------------------------------------------------------------------------------------|-------------|-------------|------------|--------|-------------|------------|--------|
| 4) I believe that vaccinations are ineffective                                               | 55 (18.3%)  | 55 (18.3%)  | 2 (3.0%)   | 0.028  | 49 (25.93%) | 6 (5.45%)  | 0.028  |
| 5) I believe that disease is better than vaccination and provides more long-lasting immunity | 17 (7.2%)   | 0 (0.0%)    | 17 (5.6%)  | 0.473  | 15 (7.9%)   | 2 (1.8%)   | 0.545  |
| 6) I have not had such an opportunity yet due to limitations in the vaccination programme    | 12 (4.0%)   | 11 (4.6%)   | 1 (1.5%)   | 1.0000 | 9 (4.76%)   | 3 (2.7%)   | 0.3    |
| 7) Other reasons                                                                             | 3 (1.0%)    | 0 (0.0%)    | 3 (1.0%)   | <0.001 | 3 (1.5%)    | 0 (0.0%)   | <0.001 |
| Are you concerned about the COVID-19 vaccination in pregnancy?                               |             |             |            | <0.001 |             |            | <0.001 |
| Yes                                                                                          | 114 (38.2%) | 110 (47.2%) | 4 (6.1%)   |        | 95 (50.8%)  | 19 (17.2%) |        |
| Probably yes                                                                                 | 103 (34.5%) | 97 (41.6%)  | 6 (9.2%)   |        | 72 (38.5%)  | 30 (27.2%) |        |
| Probably no                                                                                  | 60 (20.1%)  | 22 (9.4%)   | 38 (58.4%) |        | 19 (10.1%)  | 41 (37.2%) |        |
| Definitely not                                                                               | 21 (7.0%)   | 4 (1.7%)    | 17 (26.1%) |        | 1 (0.5%)    | 20 (18.1%) |        |
| Are you going to be vaccinated against COVID-19 when you are                                 |             |             |            | <0.001 |             |            | <0.001 |

|                                                                                                                                         |             |             |            |        |             |            |        |
|-----------------------------------------------------------------------------------------------------------------------------------------|-------------|-------------|------------|--------|-------------|------------|--------|
| pregnant (if you have not yet been vaccinated)?                                                                                         |             |             |            |        |             |            |        |
| Yes                                                                                                                                     | 37 (12.3%)  | 9 (3.8%)    | 28 (43.0%) |        | 8 (4.2%)    | 29 (26.3%) |        |
| Probably yes                                                                                                                            | 41 (13.6%)  | 16 (6.8%)   | 25 (38.4%) |        | 13 (6.8%)   | 28 (25.4%) |        |
| I do not know                                                                                                                           | 45 (15.0%)  | 41 (17.4%)  | 4 (6.1%)   |        | 31 (16.4%)  | 14 (12.7%) |        |
| No                                                                                                                                      | 140 (46.6%) | 136 (57.8%) | 4 (6.1%)   |        | 111 (58.7%) | 28 (25.4%) |        |
| Definitely not                                                                                                                          | 37 (12.3%)  | 33 (14.0%)  | 4 (6.1%)   |        | 26 (13.7%)  | 11 (10.0%) |        |
| The question concerns women who answered 'no'/'rather not'/'definitely not' to the previous question. Reason for the negative approach: |             |             |            |        |             |            |        |
| 1) Fear of post-vaccination complications/adverse reactions                                                                             | 189 (63.0%) | 179 (76.1%) | 10 (15.3%) | <0.001 | 141 (74.6%) | 48 (43.6%) | <0.001 |
| 2) Fear of damage to the foetus                                                                                                         | 178 (59.3%) | 170 (72.3%) | 8 (12.3%)  | <0.001 | 131 (69.3%) | 47 (42.7%) | <0.001 |
| 3) Fear of complications for pregnancy such as pre-term delivery                                                                        | 110 (36.6%) | 108 (45.9%) | 2 (3.0%)   | <0.001 | 88 (46.5%)  | 21 (19.0%) | <0.001 |

|                                                                                                           |             |             |            |        |            |            |        |
|-----------------------------------------------------------------------------------------------------------|-------------|-------------|------------|--------|------------|------------|--------|
| 4) I believe that vaccinations are ineffective                                                            | 178 (59.3%) | 45 (19.1%)  | 1 (1.5%)   | 0.2134 | 42 (22.2%) | 4 (3.6%)   | 0.493  |
| 5) I believe that disease is better than vaccination and provides more long-lasting immunity              | 9 (3.0%)    | 9 (3.8%)    | 0%(0.0)    | 1.000  | 7 (3.7%)   | 2 (1.8%)   | 1.000  |
| 6) Other reasons                                                                                          | 1 (0.4%)    | 0 (0.0%)    | 1 (0.4%)   | <0.001 | 1 (0.5%)   | 0 (0.0%)   | <0.001 |
| Have you vaccinated your children against COVID-19?                                                       |             |             |            | <0.001 |            |            | <0.001 |
| Yes                                                                                                       | 33 (11.0%)  | 11 (4.6%)   | 22 (33.8%) |        | 8 (4.2%)   | 25 (22.7%) |        |
| No                                                                                                        | 122 (40.6%) | 112 (47.6%) | 10 (15.3%) |        | 86 (45.5%) | 36 (32.7%) |        |
| I have not had such an opportunity yet due to the age restrictions in the vaccination programme           | 116 (38.6%) | 83 (35.3%)  | 33 (50.7%) |        | 71 (37.5%) | 45 (40.9%) |        |
| I don't have children yet                                                                                 | 29 (9.6%)   | 29 (12.3%)  | 0 (0.0%)   |        | 24 (12.7%) | 4 (3.6%)   |        |
| The question concerns women who answered 'no' to the previous question. Reason for the negative approach: |             |             |            |        |            |            |        |

|                                                                                              |             |             |             |        |             |            |        |
|----------------------------------------------------------------------------------------------|-------------|-------------|-------------|--------|-------------|------------|--------|
| 1) Risk of post-vaccination complications/undesirable effects                                | 187 (62.3%) | 19 (29.2%)  | 168 (71.4%) | <0.001 | 136 (71.9%) | 51 (46.3%) | <0.001 |
| 2) I believe that vaccinations are ineffective                                               | 87 (29.0%)  | 82 (34.8%)  | 5 (7.6%)    | <0.001 | 70 (37.0%)  | 17 (15.4%) | <0.001 |
| 3) I believe that disease is better than vaccination and provides more long-lasting immunity | 65 (21.6%)  | 64 (27.2%)  | 1 (1.5%)    | 0.006  | 54 (28.5%)  | 11 (10.0%) | 0.014  |
| 4) Other reasons                                                                             | 23 (9.7%)   | 23 (9.7%)   | 0 (0.0%)    | <0.001 | 20 (10.5%)  | 3 (2.7%)   | <0.001 |
| Are you planning to vaccinate your children against COVID-19?                                |             |             |             | <0.001 |             |            | <0.001 |
| Yes                                                                                          | 46 (15.3%)  | 11 (4.7%)   | 35 (53.8%)  |        | 7 (3.7%)    | 39 (35.4%) |        |
| Probably yes                                                                                 | 49 (16.3%)  | 29 (12.3%)  | 20 (30.7%)  |        | 26 (13.7%)  | 23 (20.9%) |        |
| I do not know                                                                                | 82 (27.42%) | 73 (31.2%)  | 9 (13.8%)   |        | 62 (32.80%) | 20 (18.1%) |        |
| No                                                                                           | 106 (35.4%) | 105 (44.8%) | 1 (1.5%)    |        | 79 (41.8%)  | 27 (24.5%) |        |
| Definitely not                                                                               | 16 (5.3%)   | 16 (6.8%)   | 0 (0.0%)    |        | 15 (7.9%)   | 1 (0.9%)   |        |



|                                                                                                                                         |             |             |            |        |             |            |        |
|-----------------------------------------------------------------------------------------------------------------------------------------|-------------|-------------|------------|--------|-------------|------------|--------|
| The question concerns women who answered 'no'/'rather not'/'definitely not' to the previous question. Reason for the negative approach: |             |             |            |        |             |            |        |
| 1) Risk of post-vaccination complications/undesirable effects                                                                           | 184 (61.3%) | 172 (73.1%) | 12 (18.4%) | <0.001 | 134 (70.9%) | 50 (45.4%) | <0.001 |
| 2) I believe that vaccinations are ineffective                                                                                          | 94 (31.3%)  | 91 (38.7%)  | 3 (4.6%)   | <0.001 | 73 (38.6%)  | 21 (19.0%) | <0.001 |
| 3) I believe that disease is better than vaccination and provides more long-lasting immunity                                            | 73 (24.3%)  | 71 (30.2%)  | 2 (3.0%)   | 0.139  | 133 (70.3%) | 93 (84.5%) | 0.029  |
| 4) Other reasons                                                                                                                        | 28 (9.3%)   | 25 (10.6%)  | 3 (4.6%)   | <0.001 | 23 (12.1%)  | 5 (4.5%)   | <0.001 |
| Would you like your relatives to get vaccinated against COVID-19?                                                                       |             |             |            | <0.001 |             |            | <0.001 |
| Yes                                                                                                                                     | 64 (21.3%)  | 36 (55.3%)  | 28 (11.9%) |        | 25 (13.2%)  | 38 (34.5%) |        |
| Yes, but only relatives at risk of severe disease                                                                                       | 66 (22.0%)  | 26 (40.0%)  | 40 (17.0%) |        | 31 (16.4%)  | 35 (31.8%) |        |
| I do not know                                                                                                                           | 68 (22.6%)  | 2 (3.0%)    | 66 (28.0%) |        | 54 (28.5%)  | 14 (12.7%) |        |

|                                                                                                                                         |             |             |             |        |             |            |        |
|-----------------------------------------------------------------------------------------------------------------------------------------|-------------|-------------|-------------|--------|-------------|------------|--------|
| No                                                                                                                                      | 93 (31.0%)  | 1 (1.5%)    | 92 (39.1%)  |        | 72 (38.1%)  | 21 (19.0%) |        |
| Definitely not                                                                                                                          | 9 (3.0%)    | 0 (0.0%)    | 9 (3.8%)    |        | 7 (3.7%)    | 2 (1.8%)   |        |
| The question concerns women who answered 'no'/'rather not'/'definitely not' to the previous question. Reason for the negative approach: |             |             |             |        |             |            |        |
| 1) Risk of post-vaccination complications/undesirable effects                                                                           | 187 (62.3%) | 177 (75.3%) | 10 (15.38%) | <0.001 | 140 (74.0%) | 47 (42.7%) | <0.001 |
| 2) I believe that vaccinations are ineffective                                                                                          | 95 (31.6%)  | 90 (38.3%)  | 5 (7.6%)    | <0.001 | 75 (39.6%)  | 20 (18.1%) | <0.001 |
| 3) I believe that disease is better than vaccination and provides more long-lasting immunity                                            | 56 (18.6%)  | 56 (23.8%)  | 0 (0.0%)    | 0.03   | 49 (25.9%)  | 7 (6.3%)   | 0.09   |
| 4) Other reasons                                                                                                                        | 17 (5.67)   | 17 (7.2)    | 0 (0)       | 0.54   | 14 (7.4)    | 3 (2.7)    | <0.001 |

Data are presented as mean  $\pm$  SD and median (Q1;Q3) for continuous variables or counts (percentages) for categorical variables

**Table S5.** General characteristics and acceptance before and after medical consultation.

|                       | Total      | Before physician consultation |            |         | After physician consultation |            |      |
|-----------------------|------------|-------------------------------|------------|---------|------------------------------|------------|------|
|                       |            | Disagree                      | Agree      | P value | Disagree                     | Agree      | p    |
| Age, years            | 25.2 ± 4.3 | 24.8 ± 4.3                    | 26.5 ± 4.2 | 0.002   | 25.0 ± 4.2                   | 25.6 ± 4.6 | 0.25 |
| Arterial hypertension | 20 (6.7)   | 13 (5.5)                      | 7 (10.8)   | 0.16    | 11 (5.8)                     | 9 (8.2)    | 0.43 |
| Epilepsy              | 9 (3.0)    | 8 (3.4)                       | 1 (1.5)    | 0.69    | 7 (3.7)                      | 2 (1.8)    | 0.49 |
| Diabetes mellitus     | 32 (10.7)  | 26 (11.0)                     | 6 (9.2)    | 0.67    | 22 (11.6)                    | 10 (9.1)   | 0.49 |
| Heart defect          | 8 (2.7)    | 5 (2.1)                       | 3 (4.6)    | 0.38    | 6 (3.2)                      | 2 (1.8)    | 0.71 |
| Bronchial asthma      | 14 (4.7)   | 9 (3.8)                       | 5 (7.7)    | 0.19    | 7 (3.7)                      | 7 (3.7)    | 0.29 |
| Pancreatitis          | 10 (3.3)   | 6 (2.5)                       | 4 (6.1)    | 0.23    | 5 (2.6)                      | 5 (2.6)    | 0.51 |
| Obesity               | 31 (10.3)  | 2 (3.1)                       | 29 (12.3)  | 0.03    | 23 (12.2)                    | 8 (7.3)    | 0.18 |
| Psoriasis             | 11 (3.7)   | 8 (3.4)                       | 3 (4.6)    | 1.0     | 7 (3.7)                      | 4 (3.6)    | 1.0  |
| Migraine              | 5 (1.7)    | 4 (1.7)                       | 1 (1.5)    | 0.71    | 0 (0)                        | 5 (1.7)    | 0.16 |
| Thrombophilia         | 10 (3.3)   | 9 (3.8)                       | 1 (1.5)    | 0.70    | 6 (3.2)                      | 4 (3.6)    | 1.0  |
| Celiac disease        | 8 (2.7)    | 5 (2.1)                       | 3 (4.6)    | 0.38    | 3 (1.6)                      | 5 (4.5)    | 0.15 |
| Sclerosis multiplex   | 9 (3.0)    | 7 (2.9)                       | 2 (3.0)    | 1.0     | 3 (1.5)                      | 6 (5.4)    | 0.08 |
| Allergy               | 17 (5.6)   | 15 (6.3)                      | 2 (3.0)    | 0.54    | 12 (6.3)                     | 5 (4.5)    | 0.52 |

|                              |          |          |           |      |          |           |      |
|------------------------------|----------|----------|-----------|------|----------|-----------|------|
| Depression                   | 9 (3.0)  | 8 (3.4)  | 1 (1.54)  | 0.69 | 7 (3.7)  | 2 (1.8)   | 0.49 |
| Bipolar affective<br>disease | 5 (1.6)  | 4 (1.7)  | 1 (1.5)   | 1.0  | 2 (1.0)  | 3 (2.7)   | 0.36 |
| Melanoma                     | 2 (0.6)  | 1 (0.4)  | 1 (1.5)   | 0.39 | 1 (0.5)  | 1 (1.54)  | 0.39 |
| Cerebral tumour              | 1 (0.3)  | 1 (0.4)  | 0 (0)     | 1.0  | 1 (0.5)  | 0 (0)     | 1.0  |
| Hypothyreosis                | 27 (9.0) | 17 (7.2) | 10 (15.3) | 0.04 | 12 (6.3) | 15 (13.6) | 0.03 |

Data are presented as mean  $\pm$  SD and counts (percentages).

**Table S6.** Other questions-acceptance before and after medical consultation.

|                                                                                                            | Before physician consultation |            |           |                 | After physician consultation |           |                 |
|------------------------------------------------------------------------------------------------------------|-------------------------------|------------|-----------|-----------------|------------------------------|-----------|-----------------|
|                                                                                                            | Total                         | Disagree   | Agree     | <i>P</i> -value | Disagree                     | Agree     | <i>P</i> -value |
| Do you think that the course of COVID-19 disease in pregnancy, compared to non-pregnant women, is usually: |                               |            |           | <0.001          |                              |           | 0.01            |
| milder                                                                                                     | 145 (48.6)                    | 134 (57.5) | 11 (16.9) |                 | 102 (54.5)                   | 43 (39.1) |                 |
| comparable                                                                                                 | 61 (20.4)                     | 45 (19.3)  | 16 (24.6) |                 | 37 (19.8)                    | 23 (20.9) |                 |
| more dangerous                                                                                             | 61 (20.4)                     | 35 (15)    | 26 (40)   |                 | 29 (15.5)                    | 32 (29.1) |                 |
| much more dangerous                                                                                        | 31 (10.4)                     | 19 (8.1)   | 12 (18.4) |                 | 19 (10.1)                    | 12 (10.9) |                 |
| Do you think that immunity obtained by disease lasts longer than immunity acquired by vaccination?         |                               |            |           | <0.001          |                              |           | 0.01            |
| definitely yes                                                                                             | 110 (36.6)                    | 106 (45.1) | 4 (6.1)   |                 | 85 (44.9)                    | 25 (22.7) |                 |
| probably yes                                                                                               | 87 (29)                       | 79 (33.6)  | 8 (12.3)  |                 | 61 (32.2)                    | 25 (22.7) |                 |

|                                                                                                                                                                  |             |             |            |        |            |            |        |
|------------------------------------------------------------------------------------------------------------------------------------------------------------------|-------------|-------------|------------|--------|------------|------------|--------|
| probably not                                                                                                                                                     | 58 (19.3)   | 32 (13.6)   | 26 (40)    |        | 28 (14.8)  | 30 (27.2)  |        |
| definitely not                                                                                                                                                   | 45 (15)     | 18 (7.6)    | 27 (41.5)  |        | 15 (7.9)   | 30 (27.2)  |        |
| What do you think is the effectiveness of COVID-19 vaccines in protecting against the disease (what percentage of people vaccinated will not contract COVID-19)? |             |             |            | <0.001 |            |            | <0.001 |
| about 20%                                                                                                                                                        | 77 (25.6%)  | 70 (29.7%)  | 7 (10.7%)  |        | 26 (13.7%) | 52 (47.2%) |        |
| about 40%                                                                                                                                                        | 94 (31.3%)  | 91 (38.7%)  | 3 (4.6%)   |        | 99 (52.3%) | 29 (26.3%) |        |
| about 70%                                                                                                                                                        | 67 (22.3%)  | 48 (20.4%)  | 19 (29.2%) |        | 29 (15.3%) | 18 (16.3%) |        |
| about 90%                                                                                                                                                        | 62 (20.6%)  | 26 (11.0%)  | 36 (55.3%) |        | 35 (18.5%) | 11 (10.0%) |        |
| Do you think vaccination against COVID-19 is safe in pregnancy?                                                                                                  |             |             |            | <0.001 |            |            | <0.001 |
| yes                                                                                                                                                              | 78 (26.0%)  | 33 (14.0%)  | 45 (69.2%) |        | 26 (13.7%) | 52 (47.2%) |        |
| no                                                                                                                                                               | 128 (42.6%) | 120 (51.0%) | 8 (12.3%)  |        | 99 (52.3%) | 29 (26.3%) |        |
| depends on the trimester of pregnancy                                                                                                                            | 47 (15.6%)  | 38 (16.1%)  | 9 (13.8%)  |        | 29 (15.3%) | 18 (16.3%) |        |
| do not know                                                                                                                                                      | 47 (15.67%) | 44 (18.7)   | 3 (4.6%)   |        | 35 (18.5%) | 11 (10.0%) |        |

|                                                                                                                      |            |            |           |        |            |            |        |
|----------------------------------------------------------------------------------------------------------------------|------------|------------|-----------|--------|------------|------------|--------|
| Do you think complications after vaccination against COVID-19 are:                                                   |            |            |           | <0.001 |            |            | <0.001 |
| very rare                                                                                                            | 27 (9)     | 11 (4.6)   | 16 (24.6) |        | 11 (5.8%)  | 16 (14.5%) |        |
| rare                                                                                                                 | 89 (29.6)  | 48 (20.4)  | 41 (63)   |        | 37 (19.5%) | 51 (46.3%) |        |
| do not know                                                                                                          | 22 (7.3)   | 20 (8.5)   | 2 (3)     |        | 20 (10.5%) | 2 (1.8%)   |        |
| often                                                                                                                | 88 (29.3)  | 86 (36.6)  | 2 (3)     |        | 67 (35.4%) | 21 (19.0%) |        |
| very often                                                                                                           | 74 (24.6)  | 70 (29.7)  | 4 (6.1)   |        | 54 (28.5%) | 20 (18.1%) |        |
| Do you think that complications after vaccination against COVID-19 in pregnancy, compared to non-pregnant women, are |            |            |           | <0.001 |            |            | <0.001 |
| less dangerous                                                                                                       | 29 (9.6)   | 24 (10.2)  | 5 (7.6)   |        | 19 (10)    | 10 (9)     |        |
| equally dangerous                                                                                                    | 83 (27.6)  | 33 (14)    | 50 (76.9) |        | 26 (13.7)  | 57 (51.8)  |        |
| more dangerous                                                                                                       | 151 (50.3) | 144 (61.2) | 7 (10.7)  |        | 115 (60.8) | 36 (32.7)  |        |
| do not know                                                                                                          | 37 (12.3)  | 34 (14.4)  | 3 (4.6)   |        | 29 (15.3)  | 7 (6.3)    |        |
| Is the COVID-19 vaccine dangerous to the foetus?                                                                     |            |            |           | <0.001 |            |            | <0.001 |

|                                                                                         |             |             |            |        |            |           |        |
|-----------------------------------------------------------------------------------------|-------------|-------------|------------|--------|------------|-----------|--------|
| yes                                                                                     | 164 (54.6%) | 142 (60.4%) | 22 (33.8%) |        | 108 (57.1) | 56 (50.9) |        |
| no                                                                                      | 56 (18.6%)  | 30 (12.7%)  | 26 (40.0%) |        | 24 (12.7)  | 32 (29)   |        |
| do not know                                                                             | 60 (20.0%)  | 49 (20.8%)  | 11 (16.9%) |        | 43 (22.7)  | 17 (15.4) |        |
| Insufficient research on this topic                                                     | 20 (6.6%)   | 14 (5.9%)   | 6 (9.2%)   |        | 14 (7.4)   | 5 (4.5)   |        |
| Have you been vaccinated against COVID-19?                                              |             |             |            | <0.001 |            |           | <0.001 |
| yes                                                                                     | 11 (3.6)    | 0 (0)       | 11 (16.9)  |        | 2 (1)      | 9 (8.18)  |        |
| yes, before pregnancy                                                                   | 16 (5.3)    | 0 (0)       | 16 (24.6)  |        | 2 (1)      | 14 (12.7) |        |
| yes, during pregnancy                                                                   | 5 (1.6)     | 0 (0)       | 5 (7.6)    |        | 0 (0)      | 5 (4.5)   |        |
| The first dose during pregnancy, the second dose during pregnancy                       | 6 (2)       | 0 (0)       | 6 (9.2)    |        | 0 (0)      | 6 (5.4)   |        |
| I postponed the first dose before pregnancy - full vaccination until later in pregnancy | 12 (4)      | 0 (0)       | 12 (18.4)  |        | 1 (0.5)    | 11 (10)   |        |
| I postponed the first dose during pregnancy - full vaccination after pregnancy          | 15 (5)      | 0 (0)       | 15 (23)    |        | 2 (1)      | 13 (11.8) |        |
| no                                                                                      | 235 (78.3%) | 235 (100)   | 0 (0)      |        | 182 (96.3) | 52 (47.2) |        |



|                                                                                                                |             |            |            |        |             |            |        |
|----------------------------------------------------------------------------------------------------------------|-------------|------------|------------|--------|-------------|------------|--------|
| The question concerns women who answered 'no' to the previous question. Reason for the negative approach:      |             |            |            |        |             |            |        |
| 1) Fear of post-vaccination complications/adverse reactions                                                    | 164 (69.7)  | 9 (13.8)   | 173 (57.6) | <0.001 | 133 (70.3)  | 40 (36.3)  | <0.001 |
| 2) Fear of damage to the foetus                                                                                | 201 (67)    | 189 (80.4) | 12 (18.4%) | <0.001 | 144 (76.1%) | 56 (50.9%) | <0.001 |
| 3) Fear of complications for pregnancy such as pre-term labour                                                 | 103 (34.3%) | 98 (41.7)  | 5 (7.6%)   | <0.001 | 83 (43.9%)  | 20 (18.1%) | <0.001 |
| 4) I believe that vaccinations are ineffective                                                                 | 55 (18.3%)  | 55 (18.3)  | 2 (3)      | 0.03   | 49 (25.93%) | 6 (5.45%)  | 0.028  |
| 5) I believe that going through the disease is better than vaccination and provides more long-lasting immunity | 17 (7.2%)   | 0 (0)      | 17 (5.6%)  | 0.473  | 15 (7.9%)   | 2 (1.8%)   | 0.545  |
| 6) I have not had such an opportunity yet due to the limitations in the vaccination programme                  | 12 (4)      | 11 (4.6)   | 1 (1.5%)   | 1.0000 | 9 (4.8)     | 3 (2.7%)   | 0.300  |
| 7) Other reasons                                                                                               | 3 (1)       | 0 (0)      | 3 (1)      | <0.001 | 3 (1.5)     | 0 (0)      | <0.001 |
| Are you concerned about the COVID-19 vaccination during pregnancy?                                             |             |            |            | <0.001 |             |            | <0.001 |
| yes                                                                                                            | 114 (38.2)  | 110 (47.2) | 4 (6.1)    |        | 95 (50.8)   | 19 (17.2)  |        |
| probably yes                                                                                                   | 103 (34.5%) | 97 (41.6%) | 6 (9.2%)   |        | 72 (38.5%)  | 30 (27.2%) |        |

|                                                                                                                                         |             |             |            |        |             |            |        |
|-----------------------------------------------------------------------------------------------------------------------------------------|-------------|-------------|------------|--------|-------------|------------|--------|
| probably not                                                                                                                            | 60 (20.1%)  | 22 (9.4%)   | 38 (58.4%) |        | 19 (10.1%)  | 41 (37.2%) |        |
| definitely not                                                                                                                          | 21 (7.0%)   | 4 (1.7%)    | 17 (26.1%) |        | 1 (0.5%)    | 20 (18.1%) |        |
| Do you intend to vaccinate against COVID-19 during pregnancy if you have not yet been vaccinated)?                                      |             |             |            | <0.001 |             |            | <0.001 |
| yes                                                                                                                                     | 37 (12.3%)  | 9 (3.8%)    | 28 (43.0%) |        | 8 (4.2%)    | 29 (26.3%) |        |
| Probably yes                                                                                                                            | 41 (13.6%)  | 16 (6.8%)   | 25 (38.4%) |        | 13 (6.8%)   | 28 (25.4%) |        |
| do not know                                                                                                                             | 45 (15.0%)  | 41 (17.4%)  | 4 (6.1%)   |        | 31 (16.4%)  | 14 (12.7%) |        |
| no                                                                                                                                      | 140 (46.6%) | 136 (57.8%) | 4 (6.1%)   |        | 111 (58.7%) | 28 (25.4%) |        |
| definitely not                                                                                                                          | 37 (12.3%)  | 33 (14.0%)  | 4 (6.1%)   |        | 26 (13.7%)  | 11 (10.0%) |        |
| The question concerns women who answered 'no'/'rather not'/'definitely not' in the previous question. Reason for the negative approach: |             |             |            |        |             |            |        |
| 1) Fear of post-vaccination complications/adverse reactions                                                                             | 189 (63.0%) | 179 (76.1%) | 10 (15.3%) | <0.001 | 141 (74.6%) | 48 (43.6%) | <0.001 |
| 2) Fear of damage to the foetus                                                                                                         | 178 (59.3%) | 170 (72.3%) | 8 (12.3%)  | <0.001 | 131 (69.3%) | 47 (42.7%) | <0.001 |
| 3) Fear of complications for pregnancy such as pre-term labour                                                                          | 110 (36.6%) | 108 (45.9%) | 2 (3.0%)   | <0.001 | 88 (46.5%)  | 21 (19.0%) | <0.001 |

|                                                                                                                |             |             |                |        |             |            |        |
|----------------------------------------------------------------------------------------------------------------|-------------|-------------|----------------|--------|-------------|------------|--------|
| 4) I believe that vaccinations are ineffective                                                                 | 178 (59.3%) | 45 (19.1%)  | 1 (1.5%)       | 0.21   | 42 (22.2%)  | 4 (3.6%)   | 0.493  |
| 5) I believe that going through the disease is better than vaccination and provides more long-lasting immunity | 9 (3.0%)    | 9 (3.8%)    | 0%(0.0)        | 1.000  | 7 (3.7%)    | 2 (1.8%)   | 1.000  |
| 6) Other reasons                                                                                               | 1 (0.4%)    | 0 (0.0%)    | 1 (0.4%)       | <0.001 | 1 (0.5%)    | 0 (0.0%)   | <0.001 |
| Have you vaccinated your children against COVID-19?                                                            |             |             |                | <0.001 |             |            | <0.001 |
| yes                                                                                                            | 33 (11.0%)  | 11 (4.6%)   | 22 (33.8%)     |        | 8 (4.2%)    | 25 (22.7%) |        |
| no                                                                                                             | 122 (40.6%) | 112 (47.6%) | 10 (15.3%)     |        | 86 (45.5%)  | 36 (32.7%) |        |
| I have not had such an opportunity yet due to the age restrictions in the vaccination programme                | 116 (38.6%) | 83 (35.3%)  | 33 (50.7%)     |        | 71 (37.5%)  | 45 (40.9%) |        |
| I don't have children yet                                                                                      | 29 (9.6%)   | 29 (12.3%)  | 0 (0.0%)       |        | 24 (12.7%)  | 4 (3.6%)   |        |
| The question concerns women who answered 'no' to the previous question. Reason for the negative approach:      |             |             |                |        |             |            |        |
| 1) Risk of complications/adverse reactions from vaccination                                                    | 187 (62.3%) | 19 (29.2%)  | 168<br>(71.4%) | <0.001 | 136 (71.9%) | 51 (46.3%) | <0.001 |

|                                                                                                                                          |             |             |            |        |             |            |        |
|------------------------------------------------------------------------------------------------------------------------------------------|-------------|-------------|------------|--------|-------------|------------|--------|
| 2) I believe that vaccinations are ineffective                                                                                           | 87 (29.0%)  | 82 (34.8%)  | 5 (7.6%)   | <0.001 | 70 (37.0%)  | 17 (15.4%) | <0.001 |
| 3) I believe that going through the disease is better than vaccination and provides more long-lasting immunity                           | 65 (21.6%)  | 64 (27.2%)  | 1 (1.5%)   | 0.006  | 54 (28.5%)  | 11 (10.0%) | 0.014  |
| 4) Other reasons                                                                                                                         | 23 (9.7%)   | 23 (9.7%)   | 0 (0.0%)   | <0.001 | 20 (10.5%)  | 3 (2.7%)   | <0.001 |
| Have you vaccinated your children against COVID 19?                                                                                      |             |             |            | <0.001 |             |            | <0.001 |
| yes                                                                                                                                      | 46 (15.3)   | 11 (4.7%)   | 35 (53.8%) |        | 7 (3.7%)    | 39 (35.4%) |        |
| probably yes                                                                                                                             | 49 (16.3)   | 29 (12.3%)  | 20 (30.7%) |        | 26 (13.7%)  | 23 (20.9%) |        |
| do not know                                                                                                                              | 82 (27.4)   | 73 (31.2%)  | 9 (13.8%)  |        | 62 (32.80%) | 20 (18.1%) |        |
| no                                                                                                                                       | 106 (35.4)  | 105 (44.8%) | 1 (1.5%)   |        | 79 (41.8%)  | 27 (24.5%) |        |
| definitely not                                                                                                                           | 16 (5.3)    | 16 (6.8%)   | 0 (0)      |        | 15 (7.9%)   | 1 (0.9%)   |        |
| The question concerns women who answered 'no'/'rather not'/'definitely not' in the previous question.. Reason for the negative approach: |             |             |            |        |             |            |        |
| 1) Risk of complications/adverse reactions from vaccination                                                                              | 184 (61.3%) | 172 (73.1%) | 12 (18.4%) | <0.001 | 134 (70.9%) | 50 (45.4%) | <0.001 |
| 2) I believe that vaccinations are ineffective                                                                                           | 94 (31.3%)  | 91 (38.7%)  | 3 (4.6%)   | <0.001 | 73 (38.6%)  | 21 (19.0%) | <0.001 |

|                                                                                                                                      |            |            |           |        |             |            |        |
|--------------------------------------------------------------------------------------------------------------------------------------|------------|------------|-----------|--------|-------------|------------|--------|
| 3) I believe that going through the disease is better than vaccination and provides more long-lasting immunity                       | 73 (24.3%) | 71 (30.2%) | 2 (3)     | 0.14   | 133 (70.3%) | 93 (84.5%) | 0.029  |
| 4) Other reasons                                                                                                                     | 28 (9.3%)  | 25 (10.6%) | 3 (4.6%)  | <0.001 | 23 (12.1%)  | 5 (4.5%)   | <0.001 |
| Would you like your relatives to get vaccinated against COVID-19?                                                                    |            |            |           | <0.001 |             |            | <0.001 |
| yes                                                                                                                                  | 64 (21.3)  | 36 (55.3)  | 28 (11.9) |        | 25 (13.2)   | 38 (34.5)  |        |
| yes, but only relatives at risk of developing severe disease                                                                         | 66 (22)    | 26 (40)    | 40 (17)   |        | 31 (16.4)   | 35 (31.8)  |        |
| do not know                                                                                                                          | 68 (22.6)  | 2 (3)      | 66 (28)   |        | 54 (28.5)   | 14 (12.7)  |        |
| no                                                                                                                                   | 93 (31)    | 1 (1.5)    | 92 (39.1) |        | 72 (38.1)   | 21 (19)    |        |
| definitely not                                                                                                                       | 9 (3)      | 0 (0)      | 9 (3.8)   |        | 7 (3.7)     | 2 (1.8)    |        |
| The question concerns women answered 'no'/'rather not'/'definitely not' in the previous question.. Reason for the negative approach: |            |            |           |        |             |            |        |
| 1) Risk of complications/adverse reactions from vaccination                                                                          | 187 (62.3) | 177 (75.3) | 10 (15.4) | <0.001 | 140 (74)    | 47 (42.7)  | <0.001 |
| 2) I believe that vaccinations are ineffective                                                                                       | 95 (31.6)  | 90 (38.3)  | 5 (7.6)   | <0.001 | 75 (39.6)   | 20 (18.1)  | <0.001 |

|                                                                                                                |           |           |       |      |           |         |        |
|----------------------------------------------------------------------------------------------------------------|-----------|-----------|-------|------|-----------|---------|--------|
| 3) I believe that going through the disease is better than vaccination and provides more long-lasting immunity | 56 (18.6) | 56 (23.8) | 0 (0) | 0.03 | 49 (25.9) | 7 (6.3) | 0.09   |
| 4) Other reasons                                                                                               | 17 (5.67) | 17 (7.2)  | 0 (0) | 0.54 | 14 (7.4)  | 3 (2.7) | <0.001 |

Data are presented as counts (percentages)

**Table S7.** Predictors of vaccination against Covid-19 – univariate logistic regression before consultation with physicians.

| Variable      | OR per         | OR (95% CI)          | P-value | AUC   |
|---------------|----------------|----------------------|---------|-------|
| Country       | Ukraine/Poland | 0.272 (0.144; 0.491) | <0.001  | 0.652 |
| Age           | 1 year         | 1.093 (1.026; 1.165) | 0.005   | 0.621 |
| Age           | 5 years        | 1.558 (1.139; 2.144) | 0.005   | 0.621 |
| Obesity       | yes vs. no     | 0.226 (0.036; 0.778) | 0.01    | 0.546 |
| Accommodation | 1 unit         | 1.744 (1.257; 2.470) | <0.001  | 0.629 |
| Education     | 1 unit         | 1.519 (1.129; 2.090) | 0.005   | 0.617 |

|                                                                                                                                                                                     |            |                      |        |       |
|-------------------------------------------------------------------------------------------------------------------------------------------------------------------------------------|------------|----------------------|--------|-------|
| Number of children                                                                                                                                                                  | 1 child    | 0.731 (0.530; 0.987) | 0.04   | 0.573 |
| Allergies                                                                                                                                                                           | yes vs. no | 2.286 (1.303; 4.015) | 0.004  | 0.597 |
| 14. Do you think that the course of COVID-19 disease in pregnancy, compared to non-pregnant women, is usually: 1. milder 2. comparable 3. more dangerous<br>4. much more dangerous? | 1 unit     | 2.135 (1.639; 2.817) | <0.001 | 0.728 |
| 15. Do you think that immunity obtained through disease lasts longer than that acquired through vaccination? 1.definitely yes 2.probably yes<br>3.probably not<br>4.definitely not. | 1 unit     | 3.735 (2.707; 5.335) | <0.001 | 0.832 |
| 16. What do you think the effectiveness of COVID-19 vaccines is in protecting against the disease (what percentage of people vaccinated will not contract COVID-19)?                | 1 unit     | 3.244 (2.357; 4.610) | <0.001 | 0.792 |

|                                                                                                                                                                          |            |                      |        |       |
|--------------------------------------------------------------------------------------------------------------------------------------------------------------------------|------------|----------------------|--------|-------|
| 1. About 20% 2. About 40% 3. About 70% 4. Above 90%                                                                                                                      |            |                      |        |       |
| 18. Do you think that the complications following the administration of the COVID-19 vaccine are: 1. very rare 2. rare 3. I do not know/common 4. common 5. very common  | 1 unit     | 0.271 (0.181; 0.388) | <0.001 | 0.810 |
| 21a. The question concerns women who answered 'no' to the previous question. Reason for negative approach: 1) Fear of vaccine complications/adverse reactions.           | yes vs. no | 0.070 (0.031; 0.142) | <0.001 | 0.780 |
| 21a. The question concerns women who answered 'no' in the previous question. Reason for negative approach: 2) Fear of harm to the foetus.                                | yes vs. no | 0.055 (0.026; 0.108) | <0.001 | 0.810 |
| 21a. The question concerns women who answered 'no' to the previous question. Reason for negative approach: 3) Fear of pregnancy complications such as pre-term delivery. | yes vs. no | 0.116 (0.040; 0.275) | <0.001 | 0.670 |
| 21a. The question concerns women who answered 'no' to the previous                                                                                                       | yes vs. no | 0.109 (0.018; 0.365) | <0.001 | 0.597 |



|                                                                                                                                                                                                      |            |                       |        |       |
|------------------------------------------------------------------------------------------------------------------------------------------------------------------------------------------------------|------------|-----------------------|--------|-------|
| question. Reason for negative attitude: 4) I believe that vaccinations are ineffective.                                                                                                              |            |                       |        |       |
| 22. Are you concerned about the COVID-19 vaccination during pregnancy?                                                                                                                               |            | 8.329 (5.157; 14.534) | <0.001 | 0.884 |
| 23. Are you going to get vaccinated against COVID-19 during pregnancy if you have not yet been vaccinated?                                                                                           | 1 unit     | 0.250 (0.178; 0.339)  | <0.001 | 0.860 |
| 23a. The question concerns women who answered 'no'/'rather not'/'definitely not' to the previous question. Reason for negative approach: 1) Fear of vaccine-related complications/adverse reactions. | yes vs. no | 0.057 (0.026; 0.114)  | <0.001 | 0.804 |
| 23a. The question concerns women who answered 'no' 'rather not'/'definitely not' to the previous question. Reason for negative approach: 2) Fear of harm to the foetus.                              | yes vs. no | 0.054 (0.023; 0.113)  | <0.001 | 0.800 |
| 23a. The question concerns women who answered 'no'/ 'rather not'/'definitely not' tp the previous question. Reason for negative approach:                                                            | yes vs. no | 0.037 (0.006; 0.123)  | <0.001 | 0.714 |

|                                                                                                                                                                                                                          |            |                      |        |       |
|--------------------------------------------------------------------------------------------------------------------------------------------------------------------------------------------------------------------------|------------|----------------------|--------|-------|
| 3) Fear of pregnancy complications such as pre-term delivery.                                                                                                                                                            |            |                      |        |       |
| 23a. The question concerns women who answered 'no'/'rather not'/'definitely not' to the previous question. Reason for negative attitude: 4) I believe that vaccinations are ineffective.                                 | yes vs. no | 0.066 (0.004; 0.312) | <0.001 | 0.588 |
| 24a. The question concerns women who answered 'no' to the previous question. Reason for negative approach: 1) Risk of vaccine-related complications/adverse reactions.                                                   | yes vs. no | 0.165 (0.088; 0.297) | <0.001 | 0.711 |
| 24a. The question concerns women who answered 'no' to the previous question. Reason for negative attitude: 2) I believe that vaccinations are ineffective.                                                               | yes vs. no | 0.155 (0.053; 0.368) | <0.001 | 0.636 |
| 24a. The question concerns women who answered 'no' to the previous question. Reason for negative approach: 3) I believe that going through the disease is better than vaccination and proves more long-lasting immunity. | yes vs. no | 0.042 (0.002; 0.195) | <0.001 | 0.628 |

|                                                                                                                                                                                                                                                                 |            |                      |        |       |
|-----------------------------------------------------------------------------------------------------------------------------------------------------------------------------------------------------------------------------------------------------------------|------------|----------------------|--------|-------|
| 25. Will you vaccinate your child/children against COVID-19?                                                                                                                                                                                                    | 1 unit     | 0.173 (0.111; 0.254) | <0.001 | 0.898 |
| 25a. The question concerns women who answered 'no'/'rather not'/'definitely not' to the previous question. Reason for negative approach:<br><br>1) Risk of vaccine-related complications/adverse reactions.                                                     | yes vs. no | 0.083 (0.040; 0.160) | <0.001 | 0.774 |
| 25a. The question concerns women who answered 'no' / 'rather not'/'definitely not' to the previous question. Reason for negative attitude: 2)<br><br>I believe that vaccinations are ineffective.                                                               | yes vs. no | 0.077 (0.018; 0.215) | <0.001 | 0.670 |
| 25a. The question concerns women who answered 'no'/'rather not'/'definitely not' to the previous question. Reason for negative approach:<br><br>3) I believe that going through the disease is better than vaccination and provides more long-lasting immunity. | yes vs. no | 0.073 (0.012; 0.243) | <0.001 | 0.636 |
| 26. Would you like your relatives to get vaccinated against COVID-19?                                                                                                                                                                                           | 1 unit     | 0.217 (0.142; 0.314) | <0.001 | 0.860 |
| 26a. The question concerns women who answered 'no'/'rather not'/'definitely not' to the previous question. Reason for negative approach:                                                                                                                        | yes vs. no | 0.060 (0.027; 0.120) | <0.001 | 0.799 |

|                                                                                                                                                                                           |            |                      |        |       |
|-------------------------------------------------------------------------------------------------------------------------------------------------------------------------------------------|------------|----------------------|--------|-------|
| not/'definitely not' to the previous question. Reason for negative approach:<br>1) Risk of vaccine-related complications/adverse reactions.                                               |            |                      |        |       |
| 26a. The question concerns women who answered 'no' / 'rather not/'definitely not' to the previous question. Reason for negative attitude: 2) I believe that vaccinations are ineffective. | yes vs. no | 0.134 (0.046; 0.317) | <0.001 | 0.653 |
| 2. Do you think that immunity obtained through disease lasts longer than that acquired through vaccination?                                                                               | 1 unit     | 2.316 (1.597; 3.541) | <0.001 | 0.678 |
| 3. What do you think the effectiveness of COVID-19 vaccines is in protecting against the disease (what percentage of people vaccinated will not contract COVID 19)?                       | 1 unit     | 2.241 (1.454; 3.840) | <0.001 | 0.618 |
| 5. Do you think that complications after vaccination against COVID-19 are:                                                                                                                | 1 unit     | 0.372 (0.234; 0.552) | <0.001 | 0.716 |
| 8a. The question concerns women who answered 'no' to the previous                                                                                                                         | yes vs. no | 0.049 (0.012; 0.136) | <0.001 | 0.726 |

|                                                                                                                                                                         |            |                      |        |       |
|-------------------------------------------------------------------------------------------------------------------------------------------------------------------------|------------|----------------------|--------|-------|
| question. Reason for negative approach: 1) Fear of vaccine-related complications/adverse reactions.                                                                     |            |                      |        |       |
| 8a. The question concerns women who answered 'no' to the previous question. Reason for negative approach: 2) Fear of harm to the foetus.                                | yes vs. no | 0.118 (0.056; 0.229) | <0.001 | 0.732 |
| 8a. The question concerns women who answered 'no' to the previous question. Reason for negative approach: 3) Fear of pregnancy complications such as pre-term delivery. | yes vs. no | 0.112 (0.027; 0.315) | <0.001 | 0.628 |
| 8a. The question concerns women who answered 'no' to the previous question. Reason for negative attitude: 4) I believe that vaccinations are ineffective.               | yes vs. no | 0.151 (0.008; 0.743) | 0.01   | 0.539 |
| 9. Are you concerned about vaccination against COVID-19 during pregnancy?                                                                                               | 1 unit     | 3.372 (2.284; 5.249) | <0.001 | 0.773 |
| 10. Are you going to get vaccinated against COVID-19 when you are                                                                                                       | 1 unit     | 0.451 (0.326; 0.601) | <0.001 | 0.738 |

|                                                                                                                                                                                                           |            |                      |        |       |
|-----------------------------------------------------------------------------------------------------------------------------------------------------------------------------------------------------------|------------|----------------------|--------|-------|
| pregnant if you have not yet been vaccinated?                                                                                                                                                             |            |                      |        |       |
| 10a. The question concerns women who answered 'no'/ 'rather not'/'definitely not' to the previous question. Reason for negative approach:<br>1) Fear of vaccine-related complications/adverse reactions.  | yes vs. no | 0.288 (0.132; 0.570) | <0.001 | 0.617 |
| 10a. The question concerns women who answered 'no'/ 'rather not'/'definitely not' to the previous question. Reason for negative approach:<br>2) Fear of harm to the foetus.                               | yes vs. no | 0.143 (0.042; 0.363) | <0.001 | 0.627 |
| 10a. The question concerns women who answered 'no'/'rather not'/'definitely not' to the previous question. Reason for negative approach:<br>3) Fear of pregnancy complications such as pre-term delivery. | yes vs. no | 0.086 (0.005; 0.412) | <0.001 | 0.569 |
| 11a. The question concerns women who answered 'no' to the previous question. Reason for negative approach: 1) Risk of vaccine-related complications/adverse reactions.                                    | yes vs. no | 0.292 (0.151; 0.538) | <0.001 | 0.638 |

|                                                                                                                                                                                                       |            |                      |        |       |
|-------------------------------------------------------------------------------------------------------------------------------------------------------------------------------------------------------|------------|----------------------|--------|-------|
| 11a. The question concerns women who answered 'no' to the previous question. Reason for negative approach: 2) I believe that vaccinations are ineffective.                                            | yes vs. no | 0.194 (0.046; 0.553) | 0.001  | 0.577 |
| 12. Will you vaccinate your child/children against COVID-19?                                                                                                                                          | 1 unit     | 0.295 (0.175; 0.459) | <0.001 | 0.733 |
| 12a. The question concerns women who answered 'no'/ 'rather not'/'definitely not' in the previous question. Reason for negative approach: 1) Risk of vaccine-related complications/adverse reactions. | yes vs. no | 0.367 (0.155; 0.772) | 0.007  | 0.577 |
| 13. Would you like your relatives to be vaccinated against COVID-19?                                                                                                                                  | 1 unit     | 0.287 (0.156; 0.469) | <0.001 | 0.694 |
| 13a. The question concerns women who answered 'no'/ 'rather not'/'definitely not' to the previous question. Reason for negative approach: 1) Risk of vaccine-related complications/adverse reactions. | yes vs. no | 0.225 (0.066; 0.579) | 0.001  | 0.582 |

**Table S8.** Predictors of vaccination against COVID-19 – univariate logistic regression after consultation with physician.

| Variable                                                                                                       | OR per         | OR (95% CI)          | P-value | AUC   |
|----------------------------------------------------------------------------------------------------------------|----------------|----------------------|---------|-------|
| Country                                                                                                        | Ukraine/Poland | 0.221 (0.131; 0.365) | <0.001  | 0.678 |
| Hypothyroidism                                                                                                 | yes vs. no     | 2.329 (1.050; 5.272) | 0.04    | 0.536 |
| 2. Place of residence                                                                                          | 1 unit         | 1.306 (1.002; 1.715) | 0.04    | 0.572 |
| 3. Education                                                                                                   | 1 unit         | 1.381 (1.083; 1.779) | 0.009   | 0.606 |
| 4. Prior births                                                                                                | yes vs. no     | 0.570 (0.352; 0.918) | 0.02    | 0.568 |
| 5. Number of prior births                                                                                      | 1 unit         | 0.654 (0.498; 0.848) | 0.001   | 0.606 |
| 6. Number of children                                                                                          | 1 unit         | 0.658 (0.502; 0.853) | 0.001   | 0.595 |
| 14. Do you think that the course of COVID-19 disease in pregnancy, compared to non-pregnant women, is usually: | 1 unit         | 1.314 (1.052; 1.646) | 0.016   | 0.584 |
| 15. Do you think that immunity obtained by disease lasts longer than                                           | 1 unit         | 1.939 (1.538; 2.471) | <0.001  | 0.683 |



|                                                                                                                                                                          |            |                      |        |       |
|--------------------------------------------------------------------------------------------------------------------------------------------------------------------------|------------|----------------------|--------|-------|
| immunity acquired by vaccination?                                                                                                                                        |            |                      |        |       |
| 16. What do you think is the effectiveness of COVID-19 vaccines in protecting against the disease (what percentage of people vaccinated will not contract COVID 19)?     | 1 unit     | 1.988 (1.571; 2.544) | <0.001 | 0.693 |
| 18. Do you think that complications after vaccination against COVID 19 are:                                                                                              | 1 unit     | 0.514 (0.398; 0.654) | <0.001 | 0.687 |
| 21a. The question concerns women who answered 'no' to the previous question. Reason for negative approach: 1) Fear of vaccine complications/adverse reactions.           | yes vs. no | 0.241 (0.145; 0.394) | <0.001 | 0.67  |
| 21a. The question concerns women who answered 'no' to the previous question. Reason for negative approach: 2) Fear of harm to the foetus.                                | yes vs. no | 0.324 (0.195; 0.533) | <0.001 | 0.626 |
| 21a. The question concerns women who answered 'no' to the previous question. Reason for negative approach: 3) Fear of pregnancy complications such as pre-term delivery. | yes vs. no | 0.284 (0.158; 0.491) | <0.001 | 0.629 |

|                                                                                                                                                                                                                           |            |                      |        |        |
|---------------------------------------------------------------------------------------------------------------------------------------------------------------------------------------------------------------------------|------------|----------------------|--------|--------|
| 21a. The question concerns women who answered 'no' to the previous question. Reason for negative approach: 4) 'I believe that vaccinations are ineffective'.                                                              | yes vs. no | 0.165 (0.061; 0.371) | <0.001 | 0.602  |
| 21a. The question concerns women who answered 'no' to the previous question. Reason for negative approach: 5) 'I believe that going through the disease is better than vaccination and provides more long-term immunity'. | yes vs. no | 0.215 (0.033; 0.781) | 0.017  | 0.531  |
| 22. Are you concerned about the COVID-19 vaccination during pregnancy?                                                                                                                                                    | 1 unit     | 3.639 (2.646; 5.151) | <0.001 | 0.7681 |
| 23. Are you going to be vaccinated against COVID-19 when you are pregnant (if you have not yet been vaccinated)?                                                                                                          | 1 unit     | 0.473 (0.376; 0.587) | <0.001 | 0.7124 |
| 23a. The question concerns women who answered 'no'/'rather not'/'definitely not' to the previous question. Reason for negative approach: 1) Fear of vaccine complications/adverse reactions.                              | yes vs. no | 0.264 (0.159; 0.432) | <0.001 | 0.6548 |
| 23a. The question concerns women who answered 'no'/'rather not'/'definitely                                                                                                                                               | yes vs. no | 0.330 (0.202; 0.536) | <0.001 | 0.6329 |

|                                                                                                                                                                                                            |            |                      |        |       |
|------------------------------------------------------------------------------------------------------------------------------------------------------------------------------------------------------------|------------|----------------------|--------|-------|
| not' to the previous question. Reason for negative approach: 2) Fear of harm to the foetus.                                                                                                                |            |                      |        |       |
| 23a. The question concerns women who answered 'no'/'rather not'/'definitely not' to the previous question. Reason for negative approach: 3) Fear of complications for pregnancy such as pre-term delivery. | yes vs. no | 0.271 (0.153; 0.465) | <0.001 | 0.637 |
| 23a. The question concerns women who answered 'no'/'rather not'/'definitely not' to the previous question. Reason for negative approach: 4) 'I believe that vaccinations are ineffective'.                 | yes vs. no | 0.132 (0.039; 0.339) | <0.001 | 0.596 |
| 24a. The question concerns women who answered 'no' to the previous question. Reason for negative approach: 1) Risk of vaccine-related complications/adverse reactions.                                     | yes vs. no | 0.337 (0.205; 0.549) | <0.001 | 0.628 |
| 24a. The question concerns women who answered 'no' to the previous question. Reason for negative approach: 2) 'I believe that vaccinations are                                                             | yes vs. no | 0.311 (0.167; 0.553) | <0.001 | 0.608 |

|                                                                                                                                                                                                                              |            |                      |        |        |
|------------------------------------------------------------------------------------------------------------------------------------------------------------------------------------------------------------------------------|------------|----------------------|--------|--------|
| ineffective’.                                                                                                                                                                                                                |            |                      |        |        |
| 24a. The question concerns women who answered 'no' to the previous question. Reason for negative approach: 3) 'I believe that going through the disease is better than vaccination and provides more long-lasting immunity’. | yes vs. no | 0.278 (0.132; 0.540) | <0.001 | 0.5929 |
| 24a. The question concerns women who answered 'no' to the previous question. Reason for negative approach: 4) Other reasons.                                                                                                 | yes vs. no | 0.237 (0.055; 0.712) | 0.008  | 0.5393 |
| 25. Will you vaccinate your child/children against COVID-19?                                                                                                                                                                 | 1 unit     | 0.434 (0.339; 0.547) | <0.001 | 0.7263 |
| 25a. The question concerns women who answered 'no'/'rather not'/'definitely not' to the previous question. Reason for negative approach: 1) Risk of vaccine-related complications/adverse reactions.                         | yes vs. no | 0.342 (0.209; 0.556) | <0.001 | 0.627  |
| 25a. The question concerns women who 'no'/'rather not'/'definitely not' to the previous question. Reason for negative approach: 2) I believe that vaccinations are ineffective                                               | yes vs. no | 0.375 (0.211; 0.646) | <0.001 | 0.598  |

|                                                                                                                                                                                                                                                            |            |                      |        |       |
|------------------------------------------------------------------------------------------------------------------------------------------------------------------------------------------------------------------------------------------------------------|------------|----------------------|--------|-------|
| 25a. The question concerns women who answered 'no'/'rather not'/'definitely not' to the previous question. Reason for negative approach: 3) 'I believe that going through the disease is better than vaccination and provides more long-lasting immunity'. | yes vs. no | 0.434 (0.232; 0.780) | 0.005  | 0.571 |
| 25a. The question concerns women who answered 'no'/'rather not'/'definitely not' to the previous question. Reason for negative approach: 4) Other reasons.                                                                                                 | yes vs. no | 0.344 (0.113; 0.864) | 0.02   | 0.538 |
| 26. Would you like your relatives to be vaccinated against COVID-19?                                                                                                                                                                                       | 1 unit     | 0.546 (0.437; 0.675) | <0.001 | 0.688 |
| 26a. The question concerns women who answered 'no'/'rather not'/'definitely not' to the previous question. Reason for negative approach: 1) Risk of vaccine-related complications/adverse reactions.                                                       | yes vs. no | 0.261 (0.158; 0.428) | <0.001 | 0.657 |
| 26a. The question concerns women who answered 'no'/'rather not'/'definitely not' in the previous question. Reason for negative approach: 2) 'I believe that vaccinations are ineffective'.                                                                 | yes vs. no | 0.338 (0.188; 0.585) | <0.001 | 0.607 |

|                                                                                                                                                                                                                                                         |            |                      |        |        |
|---------------------------------------------------------------------------------------------------------------------------------------------------------------------------------------------------------------------------------------------------------|------------|----------------------|--------|--------|
| 26a. The question concerns women who answered 'no'/'rather not'/'definitely not' to the previous question. Reason for negative approach: 3) 'I believe that going through the disease is better than vaccination and gives more long-lasting immunity'. | yes vs. no | 0.194 (0.078; 0.420) | <0.001 | 0.598  |
| 1. Do you think that the course of COVID-19 disease in pregnancy, compared to non-pregnant women, is usually worse?                                                                                                                                     | 1 unit     | 1.639 (1.234; 2.210) | <0.001 | 0.629  |
| 2. Do you think that immunity obtained by disease lasts longer than immunity acquired by vaccination?                                                                                                                                                   | 1 unit     | 2.877 (2.082; 4.116) | <0.001 | 0.727  |
| 3. What do you think the effectiveness of COVID-19 vaccines is in protecting against the disease (what percentage of people vaccinated will not contract COVID-19)?                                                                                     | 1 unit     | 1.966 (1.431; 2.819) | <0.001 | 0.630  |
| 5. Do you think that complications after vaccination against COVID-19 are:                                                                                                                                                                              | 1 unit     | 0.269 (0.176; 0.390) | <0.001 | 0.755  |
| 8a. The question concerns women who answered 'no' to the previous                                                                                                                                                                                       | yes vs. no | 0.031 (0.010; 0.072) | <0.001 | 0.7815 |

|                                                                                                                                                                         |            |                      |        |      |
|-------------------------------------------------------------------------------------------------------------------------------------------------------------------------|------------|----------------------|--------|------|
| question. Reason for negative approach: 1) Fear of vaccine complications/adverse reactions.                                                                             |            |                      |        |      |
| 8a. The question concerns women who answered 'no' to the previous question. Reason for negative approach: 2) Fear of harm to the foetus.                                | yes vs. no | 0.026 (0.012; 0.052) | <0.001 | 0.85 |
| 8a. The question concerns women who answered 'no' to the previous question. Reason for negative approach: 3) Fear of pregnancy complications such as pre-term delivery. | yes vs. no | 0.146 (0.062; 0.302) | <0.001 | 0.64 |
| 8a. The question concerns women who answered 'no' to the previous question. Reason for negative approach: 4) I believe that vaccinations are ineffective.               | yes vs. no | 0.070 (0.004; 0.339) | <0.001 | 0.55 |
| 9. Are you concerned about the COVID-19 vaccination during pregnancy?                                                                                                   | 1 unit     | 3.474 (2.520; 4.961) | <0.001 | 0.78 |
| 10. Do you intend to get vaccinated against COVID-19 during pregnancy (if you have not yet been vaccinated)?                                                            | 1 unit     | 0.369 (0.277; 0.476) | <0.001 | 0.78 |

|                                                                                                                                                                                                        |            |                      |        |       |
|--------------------------------------------------------------------------------------------------------------------------------------------------------------------------------------------------------|------------|----------------------|--------|-------|
| 10a. The question concerns women who answered 'no'/'rather not'/'definitely not' to the previous question. Reason for negative approach: 1) Fear of vaccine complications/adverse reactions.           | yes vs. no | 0.171 (0.088; 0.312) | <0.001 | 0.67  |
| 10a. The question concerns women who answered 'no'/'rather not'/'definitely not' to the previous question. Reason for negative approach: 2) Fear of harm to the foetus.                                | yes vs. no | 0.155 (0.069; 0.311) | <0.001 | 0.64  |
| 10a. The question concerns women who answered 'no'/'rather not'/'definitely not' to the previous question. Reason for negative approach: 3) Fear of pregnancy complications such as pre-term delivery. | yes vs. no | 0.128 (0.030; 0.367) | <0.001 | 0.58  |
| 11a. The question concerns women who answered 'no' to the previous question. Reason for negative approach: 1) Risk of vaccine-related complications/adverse reactions.                                 | yes vs. no | 0.286 (0.170; 0.474) | <0.001 | 0.65  |
| 11a. The question concerns women who answered 'no' to the previous                                                                                                                                     | yes vs. no | 0.231 (0.092; 0.503) | <0.001 | 0.582 |



|                                                                                                                                                                                                                         |            |                      |        |        |
|-------------------------------------------------------------------------------------------------------------------------------------------------------------------------------------------------------------------------|------------|----------------------|--------|--------|
| question. Reason for negative approach: 2) I believe that vaccinations are ineffective.                                                                                                                                 |            |                      |        |        |
| 11a. The question concerns women who answered 'no' to the previous question. Reason for negative approach: 3) I believe that going through the disease is better than vaccination and gives more long-lasting immunity. | yes vs. no | 0.049 (0.003; 0.232) | <0.001 | 0.57   |
| 12. Will you vaccinate your child/children against COVID-19?                                                                                                                                                            | 1 unit     | 0.279 (0.186; 0.398) | <0.001 | 0.75   |
| 12a. The question concerns women who answered 'no'/'rather not'/'definitely not' to the previous question. Reason for negative approach: 1) Risk of vaccine-related complications/adverse reactions.                    | yes vs. no | 0.321 (0.164; 0.594) | 0.002  | 0.59   |
| 12a. The question concerns women who answered 'no'/'rather not'/'definitely not' to the previous question. Reason for negative approach: 2) I believe that vaccinations are ineffective.                                | yes vs. no | 0.040 (0.002; 0.191) | <0.001 | 0.5880 |
| 13. Would you like your relatives to be vaccinated against COVID-19?                                                                                                                                                    | 1 unit     | 0.260 (0.164; 0.387) | <0.001 | 0.72   |

|                                                                                                                                                                                                      |            |                      |        |      |
|------------------------------------------------------------------------------------------------------------------------------------------------------------------------------------------------------|------------|----------------------|--------|------|
| 13a. The question concerns women who answered 'no'/'rather not'/'definitely not' to the previous question. Reason for negative approach: 1) Risk of vaccine-related complications/adverse reactions. | yes vs. no | 0.302 (0.138; 0.603) | <0.001 | 0.58 |
|------------------------------------------------------------------------------------------------------------------------------------------------------------------------------------------------------|------------|----------------------|--------|------|
